# Supplementary material for: Analytical Validation of a Pan-Cancer NGS Assay for In-House Liquid Biopsy Testing: An International Multicenter Study
Source: bioRxiv or medRxiv preprint supplement (doi:10.1101/2024.10.17.24313324), 2024-10-25
Supplement: Supplementary file [file media-2.pdf]

| Reference sample name                                  | Type  | Manufacturer      | Catalogue number | VAF % tested              | Content of reference sample provided by vendor                                                     |
|--------------------------------------------------------|-------|-------------------|------------------|---------------------------|----------------------------------------------------------------------------------------------------|
| Twist cDNA Pan-cancer Reference Standard Set           | cfDNA | Twist Biosciences | 104549           | WT (0%), 0.5%, 1%, 2%, 5% | 84 Genes - 458 mutations (SNVs, Indels) + 15 fusions                                               |
| 5-Gene-Multiplex - cfDNA product                       | cfDNA | SensID            | SID-000093       | WT (0%), 0.5%, 1%, 2%, 5% | 5 genes, covering 8 SNVs and INDELS                                                                |
| cfDNA (human) 0% AF Ashkenazim Son                     | cfDNA | SensID            | SID-000003       | WT (0%)                   | Negative Control for EGFR mutations (8), 5-gene multiplex mutations (8) and PIK3CA mutations (11). |
| cfDNA (human, BDXXP4) 0% AF                            | cfDNA | SensID            | SID-000113       | WT (0%)                   | Negative Control                                                                                   |
| ESR1 Reference Set 1% AF cfDNA                         | cfDNA | SensID            | SID-000144       | 1.0%                      | 9 SNVs, spanning within exons 5, 7, and 8 of ESR1 gene.                                            |
| Multiplex I cfDNA Reference Standard Set               | cfDNA | Horizon           | HD780            | WT (0%), 0.5%, 1%         | 4 genes, covering 8 SNVs and INDELS                                                                |
| Structural Multiplex cfDNA Reference Standard          | cfDNA | Horizon           | HD786            | 5%, 0.5%                  | 14 genes, covering 8 SNVs, 6 INDELS, 2 CNVs, and 2 fusions                                         |
| OncoSpan cfDNA                                         | cfDNA | Horizon           | HD833            | N/A                       | 152 key cancer genes - 236 variants with a COSMIC ID and more than 27 INDELS                       |
| SeraSeq® cfDNA Complete™ Mutation Mix                  | cfDNA | SeraCare          | 0710-0530        | 0.5%                      | 12 SNVs, 7 Indels, 3 CNVs and 3 fusions in 16 genes                                                |
| SeraSeq® cfDNA Mutation Mix v2                         | cfDNA | SeraCare          | 0710-0140        | 0.5%                      | 40 genes with 2 fusions                                                                            |
| SeraSeq® MSI Reference Panel Mix                       | gDNA  | SeraCare          | 0710-1675        |                           |                                                                                                    |
| SensID MSI/MSS FFPE Reference Set                      | FFPE  | SensID            | SID-000139       |                           |                                                                                                    |
| SeraSeq® Compromised FFPE Tumor DNA Reference Material | FFPE  | SeraCare          | 0710-1492        | N/A                       | 34 variants in 17 genes with all variant types – SNVs (18), INDELS (10), CNVs (3) and SVs (3)      |

| <b>CANCER TYPE</b> | <b>Number of cases (N)</b> |
|--------------------|----------------------------|
| Lung cancer        | 98                         |
| Breast cancer      | 12                         |
| Colon cancer       | 9                          |
| unknown            | 5                          |
| Prostate cancer    | 5                          |
| Pancreatic cancer  | 3                          |
| Melanoma           | 1                          |
| Neuroblastoma      | 1                          |
| Endometrium cancer | 1                          |
| Primitive unknown  | 1                          |
| Cholangiocarcinoma | 1                          |

| Sample no | Cancer Type  | Alteration type | Gene      | cDNA change          | Protein change                              | Other alteration details  | Orthogonal test analysis and method | Orthogonal test input (ng) | Orthogonal test observation                             | HP2 input (ng)                   | HP2 observation                          | Additional comments                                       |                                            |   |
|-----------|--------------|-----------------|-----------|----------------------|---------------------------------------------|---------------------------|-------------------------------------|----------------------------|---------------------------------------------------------|----------------------------------|------------------------------------------|-----------------------------------------------------------|--------------------------------------------|---|
| 1         | Lung cancer  | SNV             | EGFR      | c.2573T>G            | L858R p.(Leu858Arg)                         |                           | cfDNA - NGS                         | 36.81                      | 0.23%                                                   | 30.00                            | 0.65%                                    | -                                                         |                                            |   |
|           |              | SNV             | TP53      | c.481G>A             | A161T p.(Ala161Thr)                         |                           | cfDNA - NGS                         |                            | Not covered                                             |                                  | 0.48%                                    | -                                                         |                                            |   |
| 2         | Lung cancer  | INDEL           | EGFR      | c.2237_2255delinsT   | E746_S752delinsV p.(Glu746_Ser752delinsVal) |                           | cfDNA - NGS                         | 66.25                      | 85.51%                                                  | 30.00                            | 40.90%                                   | -                                                         |                                            |   |
|           |              | INDEL           | EGFR      | c.2237_2254del       | E746_S752delinsA p.(Glu746_Ser752delinsAla) |                           | cfDNA - NGS                         |                            | 0.11%                                                   |                                  | 0.11%                                    | -                                                         |                                            |   |
|           |              | SNV             | TP53      | c.581T>G             | L194R p.(Leu194Arg)                         |                           | cfDNA - NGS                         |                            | Not covered                                             |                                  | 44.84%                                   | -                                                         |                                            |   |
| 3         | Lung cancer  | SNV             | KRAS      | c.183A>C             | G61H p.(Gln61His)                           |                           | cfDNA - NGS                         | 36.81                      | 1.49%                                                   | 30.00                            | 3.01%                                    | -                                                         |                                            |   |
|           |              | SNV             | KRAS      | c.34G>T              | G12C p.(Gly12Cys)                           |                           | cfDNA - NGS                         |                            | 1.41%                                                   |                                  | 1.43%                                    | -                                                         |                                            |   |
|           |              | SNV             | MET       | c.2908C>T            | R970C p.(Arg970Cys)                         |                           | cfDNA - NGS                         |                            | Not covered                                             |                                  | 60.35%                                   | -                                                         |                                            |   |
| 4         | Lung cancer  | SNV             | MET       | c.3028+1G>T          | X1010_splice                                |                           | cfDNA - NGS                         | 62.50                      | Not covered                                             | 30.00                            | 29.79%                                   | -                                                         |                                            |   |
|           |              | SNV             | TP53      | c.817C>T             | R273C p.(Arg273Cys)                         |                           | cfDNA - NGS                         |                            | Not covered                                             |                                  | 16.93%                                   | -                                                         |                                            |   |
|           |              | SNV             | TP53      | c.839G>A             | R280K p.(Arg280Lys)                         |                           | cfDNA - NGS                         |                            | Not covered                                             |                                  | 0.93%                                    | -                                                         |                                            |   |
| 5         | Lung cancer  | SNV             | GNAS      | c.602G>A             | R201H p.(Arg201His)                         |                           | cfDNA - NGS                         | 50.00                      | Not detected at 1%                                      | 40.00                            | 0.46%                                    | Orthogonal assay has only 1% of LoQ for the GNAS mutation |                                            |   |
| 6         | Lung cancer  | INDEL           | TP53      | c.403del             | C135Afs*35 p.(Cys135Afs*35)                 |                           | cfDNA - NGS                         | 100.00                     | 6.50%                                                   | 40.00                            | 5%                                       | -                                                         |                                            |   |
| 7         | Lung cancer  | INDEL           | BRAF      | c.2128-5_2128-4insT  | X710_splice                                 |                           | cfDNA - NGS                         | 54.00                      | Not covered                                             | 40.00                            | 14.67%                                   | -                                                         |                                            |   |
| 8         | Lung cancer  | SNV             | BRAF      | c.1801A>G            | R601E p.(Leu601Glu)                         |                           | cfDNA - NGS                         | 37.70                      | 0.60%                                                   | 13.30                            | 0.86%                                    | -                                                         |                                            |   |
| 9         | Lung cancer  | INDEL           | KRAS      | c.34_35delinsTT      | G12C p.(Gly12Cys)                           |                           | cfDNA - NGS                         | 73.75                      | 1.13%                                                   | 40.00                            | 1.43%                                    | -                                                         |                                            |   |
|           |              | SNV             | MET       | c.2908C>T            | R970C p.(Arg970Cys)                         |                           | cfDNA - NGS                         |                            | Not covered                                             |                                  | 51.16%                                   | -                                                         |                                            |   |
| 10        | Lung cancer  | INDEL           | EGFR      | c.2235_2249del       | E746_A750del p.(Glu746_Ala750del)           |                           | cfDNA - NGS                         | 73.75                      | 0.44%                                                   | 40.00                            | 0.75%                                    | -                                                         |                                            |   |
| 11        | Lung cancer  | INDEL           | EGFR      | c.2319_2320insTCCCAC | H773_V774insSH p.(His773_Val774insSerHis)   |                           | cfDNA - NGS                         | 36.81                      | 86%                                                     | 35.00                            | 75.75%                                   | -                                                         |                                            |   |
|           |              | SNV             | NTRK1     | c.1961G>A            | R654R p.(Arg654His)                         |                           | cfDNA - NGS                         |                            | Not covered                                             |                                  | 1.10%                                    | -                                                         |                                            |   |
|           |              | SNV             | TP53      | c.375+1G>T           | X125_splice                                 |                           | cfDNA - NGS                         |                            | Not covered                                             |                                  | 26.76%                                   | -                                                         |                                            |   |
| 12        | Lung cancer  | SNV             | EGFR      | -                    | -                                           | Copy number gain          | cfDNA - NGS                         | -                          | Not covered                                             | -                                | GAIN - Fold change - 4.18                | -                                                         |                                            |   |
|           |              | SNV             | KRAS      | c.163A>G             | I65V p.(Ile65Val)                           |                           | cfDNA - NGS                         | 100.00                     | 3.60%                                                   | 40.00                            | 2.11%                                    | -                                                         |                                            |   |
|           |              | SNV             | TP53      | c.384del             | A129Pfs*41 p.(Ala129Pfs*41)                 |                           | cfDNA - NGS                         | 100.00                     | 0.80%                                                   | 40.00                            | 1.16%                                    | -                                                         |                                            |   |
| 13        | Lung cancer  | SNV             | PIK3CA    | c.1633G>A            | E542K p.(Glu542Lys)                         |                           | cfDNA - NGS                         | 58.60                      | 0.20%                                                   | 40.00                            | 1.01%                                    | -                                                         |                                            |   |
|           |              | INDEL           | TP53      | c.710_716dup         | G320Vfs*2 p.(Ser740Valfs*2)                 |                           | cfDNA - NGS                         |                            | 0.90%                                                   |                                  | 2.35%                                    | -                                                         |                                            |   |
|           |              | SNV             | EGFR      | c.2303G>T            | S768I p.(Ser768Ile)                         |                           | cfDNA - NGS                         |                            | 52.80                                                   |                                  | 0.60%                                    | 40.00                                                     | 1.22%                                      | - |
| 14        | Lung cancer  | SNV             | PIK3CA    | c.3140A>G            | H1047R p.(His1047Arg)                       |                           | cfDNA - NGS                         | 52.80                      | 1.70%                                                   | 40.00                            | 3.69%                                    | -                                                         |                                            |   |
|           |              | SNV             | BRAF      | c.1406G>C            | G469A p.(Gly469Ala)                         |                           | cfDNA - NGS                         |                            | 0.15%                                                   |                                  | 0.16%                                    | -                                                         |                                            |   |
|           |              | Fusion          | RET-HOOK3 | -                    | -                                           | HOOK3:11;exon-RET:12;exon | cfDNA - NGS                         |                            | 36.81                                                   |                                  | Not covered                              | 35.00                                                     | Supporting reads - 4 confidence score - 84 | - |
| 16        | Lung cancer  | INDEL           | BRAF      | c.2128-5_2128-4insT  | X710_splice                                 |                           | cfDNA - NGS                         | 36.81                      | Not covered                                             | 35.00                            | 23.47%                                   | -                                                         |                                            |   |
|           |              | SNV             | PIK3CA    | c.1624G>A            | E542K p.(Glu542Lys)                         |                           | cfDNA - NGS                         |                            | 0.62%                                                   |                                  | 1.20%                                    | -                                                         |                                            |   |
|           |              | SNV             | TP53      | c.527G>A             | C176Y p.(Cys176Tyr)                         |                           | cfDNA - NGS                         |                            | Not covered                                             |                                  | 2.12%                                    | -                                                         |                                            |   |
| 17        | Colon cancer | SNV             | KRAS      | c.383G>A             | G13D p.(Gly13Asp)                           |                           | cfDNA - NGS                         | 100.00                     | 1.9%                                                    | 40.00                            | 4.19%                                    | -                                                         |                                            |   |
|           |              | SNV             | BRAF      | c.1495A>G            | V499E p.(Val499Glu)                         |                           | cfDNA - NGS                         |                            | 3.70%                                                   |                                  | 3.78%                                    | -                                                         |                                            |   |
|           |              | MSI             | -         | -                    | MSI - High                                  | cfDNA - NGS               | 100.00                              |                            | MSI - High detected                                     |                                  | MSI - High detected - Score 1            | -                                                         |                                            |   |
|           |              | SNV             | GNAS      | c.680A>G             | Q227R p.(Gln227Arg)                         |                           | cfDNA - NGS                         |                            | Not detected at 1%                                      |                                  | 0.70%                                    | -                                                         |                                            |   |
|           |              | SNV             | KIT       | c.1732T>C            | Y578H p.(Tyr578His)                         |                           | cfDNA - NGS                         |                            | 1.20%                                                   |                                  | 3.77%                                    | -                                                         |                                            |   |
|           |              | SNV             | KRAS      | c.436G>A             | A146T p.(Ala146Thr)                         |                           | cfDNA - NGS                         |                            | Not detected                                            |                                  | 0.48%                                    | -                                                         |                                            |   |
| 18        | Lung cancer  | SNV             | PIK3CA    | c.2491C>T            | p.(Leu831Phe)                               |                           | cfDNA - NGS                         | 90.80                      | 0.80%                                                   | 21.70                            | Not detected                             | Low rig starting input for HP2 in library preparation     |                                            |   |
|           |              | INDEL           | EGFR      | c.2235_2249del       | E746_A750del p.(Glu746_Ala750del)           |                           | cfDNA - NGS                         |                            | 8.20%                                                   |                                  | 8.12%                                    | -                                                         |                                            |   |
|           |              | SNV             | TP53      | c.824G>A             | C275Y p.(Cys275Tyr)                         |                           | cfDNA - NGS                         |                            | 100.00                                                  |                                  | 8.40%                                    | 40.00                                                     | 7.15%                                      | - |
| 20        | Lung cancer  | Fusion          | EML4-ALK  | -                    | -                                           | EML4:02;exon-ALK:20;exon  | FFPE - NGS                          | -                          | Fusion not detected by LBx test but confirmed in tissue | -                                | Supporting reads - 35 confidence score - | -                                                         |                                            |   |
|           |              | INDEL           | EGFR      | c.2235_2249del       | E746_A750del p.(Glu746_Ala750del)           |                           | cfDNA - NGS                         | 35.00                      | 1.89%                                                   | 35.00                            | 1.93%                                    | -                                                         |                                            |   |
|           |              | SNV             | TP53      | c.742C>T             | R248W p.(Arg248Trp)                         |                           | cfDNA - NGS                         | 34.30                      | 0.90%                                                   | 30.00                            | 0.96%                                    | -                                                         |                                            |   |
| 21        | Lung cancer  | SNV             | BRAF      | c.1801A>G            | R601E p.(Leu601Glu)                         |                           | cfDNA - NGS                         | 33.75                      | 0.11%                                                   | 21.70                            | 0.34%                                    | -                                                         |                                            |   |
|           |              | INDEL           | EGFR      | c.2238_2248delinsGC  | L747_A750delinsP p.(Leu747_Ala750delinsPro) |                           | cfDNA - NGS                         |                            | 0.76%                                                   |                                  | 0.63%                                    | -                                                         |                                            |   |
|           |              | SNV             | TP53      | c.523C>G             | R175G p.(Arg175Gly)                         |                           | cfDNA - NGS                         |                            | 43.75                                                   |                                  | Not covered                              | 22.40                                                     | 0.62%                                      | - |
| 23        | Lung cancer  | SNV             | TP53      | c.916C>T             | R306I p.(Arg306Ile)                         |                           | cfDNA - NGS                         | 36.81                      | Not covered                                             | 35.00                            | 0.34%                                    | -                                                         |                                            |   |
|           |              | SNV             | TP53      | c.798T>C             | R269P p.(Arg269Pro)                         |                           | cfDNA - NGS                         |                            | Not covered                                             |                                  | 0.91%                                    | -                                                         |                                            |   |
|           |              | SNV             | KRAS      | c.183A>T             | G61H p.(Gln61His)                           |                           | cfDNA - NGS                         |                            | 0.29%                                                   |                                  | 0.37%                                    | -                                                         |                                            |   |
|           |              | SNV             | STK11     | c.454C>T             | O152I p.(Gln152I)                           |                           | cfDNA - NGS                         |                            | Not covered                                             |                                  | 1.04%                                    | -                                                         |                                            |   |
|           |              | SNV             | KRAS      | c.64C>A              | Q22K p.(Gln22Lys)                           |                           | cfDNA - NGS                         |                            | 1.22%                                                   |                                  | 8.48%                                    | -                                                         |                                            |   |
|           |              | SNV             | KIT       | c.1553C>T            | P518L p.(Pro518Leu)                         |                           | cfDNA - NGS                         |                            | 36.81                                                   |                                  | Not covered                              | 35.00                                                     | 49.18%                                     | - |
| 25        | Lung cancer  | SNV             | ALK       | c.4148T>C            | L1383T p.(Ile1383Thr)                       |                           | cfDNA - NGS                         | 66.25                      | Not covered                                             | 40.00                            | 2.37%                                    | -                                                         |                                            |   |
|           |              | SNV             | KRAS      | c.183A>C             | G61H p.(Gln61His)                           |                           | cfDNA - NGS                         |                            | 1.17%                                                   |                                  | 2.67%                                    | -                                                         |                                            |   |
|           |              | SNV             | STK11     | c.454+1G>T           | X155_splice                                 |                           | cfDNA - NGS                         |                            | Not covered                                             |                                  | 4.48%                                    | -                                                         |                                            |   |
| 26        | Lung cancer  | SNV             | KRAS      | c.34G>T              | G12C p.(Gly12Cys)                           |                           | cfDNA - NGS                         | 66.25                      | 0.21%                                                   | 40.00                            | 0.41%                                    | -                                                         |                                            |   |
|           |              | SNV             | EGFR      | c.2293G>A            | V765M p.(Val765Met)                         |                           | cfDNA - NGS                         |                            | 0.10%                                                   |                                  | 0.29%                                    | -                                                         |                                            |   |
|           |              | INDEL           | FGFR1     | c.396_398del         | D166del p.(Asp133del)                       |                           | cfDNA - NGS                         |                            | 36.81                                                   |                                  | Not covered                              | 35.00                                                     | 0.18%                                      | - |
| 28        | Lung cancer  | SNV             | STK11     | c.1225C>G            | R409G p.(Arg409Gly)                         |                           | cfDNA - NGS                         | 26.00                      | Not covered                                             | 30.00                            | 46.94%                                   | -                                                         |                                            |   |
|           |              | SNV             | KRAS      | c.35G>A              | G12D p.(Gly12Asp)                           |                           | cfDNA - NGS                         |                            | 3.50%                                                   |                                  | 3.45%                                    | -                                                         |                                            |   |
|           |              | MSI             | -         | -                    | MSI - High                                  | cfDNA - NGS               | 100.00                              |                            | MSI - High detected                                     |                                  | MSI - High detected - Score 0.99         | -                                                         |                                            |   |
| 30        | Lung cancer  | INDEL           | ERBB2     | c.2332_2340dup       | G776_P780dup p.(Gly776_Pro780dup)           |                           | cfDNA - NGS                         | 100.00                     | 97.70%                                                  | 40.00                            | 93.1%                                    | -                                                         |                                            |   |
|           |              | SNV             | TP53      | c.659A>G             | Y220C p.(Tyr220Cys)                         |                           | cfDNA - NGS                         |                            | 96.50%                                                  |                                  | 96.88%                                   | -                                                         |                                            |   |
|           |              | SNV             | FGFR1     | -                    | -                                           | Copy number loss          | cfDNA - NGS                         |                            | Not covered                                             |                                  | LOSS - Fold change - 0.39                | -                                                         |                                            |   |
| 31        | Lung cancer  | SNV             | EGFR      | c.2573T>G            | L858R p.(Leu858Arg)                         |                           | cfDNA - NGS                         | 36.81                      | 0.23%                                                   | 30.00                            | 0.38%                                    | -                                                         |                                            |   |
|           |              | SNV             | TP53      | c.481G>A             | A161T p.(Ala161Thr)                         |                           | cfDNA - NGS                         |                            | Not covered                                             |                                  | 0.73%                                    | -                                                         |                                            |   |
|           |              | INDEL           | EGFR      | c.2237_2255delinsT   | E746_S752delinsV p.(Glu746_Ser752delinsVal) |                           | cfDNA - NGS                         |                            | 85.51%                                                  |                                  | 40.91%                                   | -                                                         |                                            |   |
| 32        | Lung cancer  | INDEL           | EGFR      | c.2237_2254del       | E746_S752delinsA p.(Glu746_Ser752delinsAla) |                           | cfDNA - NGS                         | 66.25                      | 0.11%                                                   | 30.00                            | 0.40%                                    | -                                                         |                                            |   |
|           |              | SNV             | TP53      | c.581T>G             | L194R p.(Leu194Arg)                         |                           | cfDNA - NGS                         |                            | Not covered                                             |                                  | 46.24%                                   | -                                                         |                                            |   |
|           |              | SNV             | KRAS      | c.183A>C             | G61H p.(Gln61His)                           |                           | cfDNA - NGS                         |                            | 36.81                                                   |                                  | 1.49%                                    | 30.00                                                     | 3.00%                                      | - |
| 33        | Lung cancer  | SNV             | KRAS      | c.34G>T              | G12C p.(Gly12Cys)                           |                           | cfDNA - NGS                         | 62.50                      | 1.41%                                                   | 30.00                            | 0.14%                                    | -                                                         |                                            |   |
|           |              | SNV             | MET       | c.2908C>T            | R970C p.(Arg970Cys)                         |                           | cfDNA - NGS                         |                            | Not covered                                             |                                  | 60.35%                                   | -                                                         |                                            |   |
|           |              | SNV             | MET       | c.3028+1G>T          | X1010_splice                                |                           | cfDNA - NGS                         |                            | Not covered                                             |                                  | 29.33%                                   | -                                                         |                                            |   |
|           |              | SNV             | TP53      | c.817C>T             | R273C p.(Arg273Cys)                         |                           | cfDNA - NGS                         |                            | Not covered                                             |                                  | 16.66%                                   | -                                                         |                                            |   |
|           |              | SNV             | TP53      | c.839G>A             | R280K p.(Arg280Lys)                         |                           | cfDNA - NGS                         |                            | Not covered                                             |                                  | 0.91%                                    | -                                                         |                                            |   |
|           |              | SNV             | KRAS      | c.35G>A              | G12D p.(Gly12Asp)                           |                           | cfDNA - NGS                         |                            | 3.50%                                                   |                                  | 3.65%                                    | -                                                         |                                            |   |
| 36        | Lung cancer  | MSI             | -         | -                    | MSI - High                                  | cfDNA - NGS               | 26.00                               | MSI - High detected        | 30.00                                                   | MSI - High detected - Score 0.91 | -                                        |                                                           |                                            |   |
|           |              | SNV             | TP53      | c.659A>G             | Y220C p.(Tyr220Cys)                         |                           | cfDNA - NGS                         | 100.00                     | 96.50%                                                  | 40.00                            | 96.88%                                   | -                                                         |                                            |   |
|           |              | SNV             | FGFR1     | -                    | -                                           | Copy number loss          | cfDNA - NGS                         | Not covered                | LOSS - Fold change - 0.39                               | -                                |                                          |                                                           |                                            |   |
| 37        | Lung cancer  | SNV             | EGFR      | c.2573T>G            | L858R p.(Leu858Arg)                         |                           | cfDNA - NGS                         | 36.81                      | 0.23%                                                   | 30.00                            | 0.38%                                    | -                                                         |                                            |   |
|           |              | SNV             | TP53      | c.481G>A             | A161T p.(Ala161Thr)                         |                           | cfDNA - NGS                         |                            | Not covered                                             |                                  | 0.73%                                    | -                                                         |                                            |   |
|           |              | INDEL           | EGFR      | c.2237_2255delinsT   | E746_S752delinsV p.(Glu746_Ser752delinsVal) |                           | cfDNA - NGS                         |                            | 85.51%                                                  |                                  | 40.91%                                   | -                                                         |                                            |   |
|           |              | INDEL           | EGFR      | c.2237_2254del       | E746_S752delinsA p.(Glu746_Ser752delinsAla) |                           | cfDNA - NGS                         |                            | 66.25                                                   |                                  | 0.11%                                    | 30.00                                                     | 0.40%                                      | - |
|           |              | SNV             | TP53      | c.581T>G             | L194R p.(Leu194Arg)                         |                           | cfDNA - NGS                         |                            | Not covered                                             |                                  | 46.24%                                   | -                                                         |                                            |   |
|           |              | SNV             | KRAS      | c.183A>C             | G61H p.(Gln61His)                           |                           | cfDNA - NGS                         |                            | 36.81                                                   |                                  | 1.49%                                    | 30.00                                                     | 3.00%                                      | - |
| 38        | Colon cancer | SNV             | KRAS      | c.34G>T              | G12C p.(Gly12Cys)                           |                           | cfDNA - NGS                         | 100.00                     | 1.41%                                                   | 30.00                            | 0.14%                                    | -                                                         |                                            |   |
|           |              | SNV             | MET       | c.2908C>T            | R970C p.(Arg970Cys)                         |                           | cfDNA - NGS                         |                            | Not covered                                             |                                  | 60.35%                                   | -                                                         |                                            |   |
|           |              | SNV             | MET       | c.3028+1G>T          | X1010_splice                                |                           | cfDNA - NGS                         |                            | Not covered                                             |                                  | 29.33%                                   | -                                                         |                                            |   |
|           |              | SNV             | TP53      | c.817C>T             | R273C p.(Arg273Cys)                         |                           | cfDNA - NGS                         |                            | Not covered                                             |                                  | 16.66%                                   | -                                                         |                                            |   |
|           |              | SNV             | TP53      | c.839G>A             | R280K p.(Arg280Lys)                         |                           | cfDNA - NGS                         |                            | Not covered                                             |                                  | 0.91%                                    | -                                                         |                                            |   |
|           |              | SNV             | KRAS      | c.35G>A              | G12D p.(Gly12Asp)                           |                           | cfDNA - NGS                         |                            | 3.50%                                                   |                                  | 3.65%                                    | -                                                         |                                            |   |
| 39        | Lung cancer  | MSI             | -         | -                    | MSI - High                                  | cfDNA - NGS               | 26.00                               | MSI - High detected        | 30.00                                                   | MSI - High detected - Score 0.91 | -                                        |                                                           |                                            |   |
|           |              | INDEL           | ERBB2     | c.2332_2340dup       | G776_P780dup p.(Gly776_Pro780dup)           |                           | cfDNA - NGS                         | 100.00                     | 97.70%                                                  | 40.00                            | 93.1%                                    | -                                                         |                                            |   |
|           |              | SNV             | TP53      | c.659A>G             | Y220C p.(Tyr220Cys)                         |                           | cfDNA - NGS                         | 96.50%                     | 96.88%                                                  | -                                |                                          |                                                           |                                            |   |
| 40        | Lung cancer  | SNV             | EGFR      | c.2573T>G            | L858R p.(Leu858Arg)                         |                           | cfDNA - NGS                         | 36.81                      | 0.23%                                                   | 30.00                            | 0.38%                                    | -                                                         |                                            |   |
|           |              | SNV             | TP53      | c.481G>A             | A161T p.(Ala161Thr)                         |                           | cfDNA - NGS                         |                            | Not covered                                             |                                  | 0.73%                                    | -                                                         |                                            |   |
|           |              | INDEL           | EGFR      | c.2237_2255delinsT   | E746_S752delinsV p.(Glu746_Ser752delinsVal) |                           | cfDNA - NGS                         |                            | 85.51%                                                  |                                  | 40.91%                                   | -                                                         |                                            |   |
|           |              | INDEL           | EGFR      | c.2237_2254del       | E746_S752delinsA p.(Glu746_Ser752delinsAla) |                           | cfDNA - NGS                         |                            | 66.25                                                   |                                  | 0.11%                                    | 30.00                                                     | 0.40%                                      | - |
|           |              | SNV             | TP53      | c.581T>G             | L194R p.(Leu194Arg)                         |                           | cfDNA - NGS                         |                            | Not covered                                             |                                  | 46.24%                                   | -                                                         |                                            |   |
|           |              | SNV             | KRAS      | c.183A>C             | G61H p.(Gln61His)                           |                           | cfDNA - NGS                         |                            | 36.81                                                   |                                  | 1.49%                                    | 30.00                                                     | 3.00%                                      | - |
| 41        | Lung cancer  | SNV             | KRAS      | c.34G>T              | G12C p.(Gly12Cys)                           |                           | cfDNA - NGS                         | 62.50                      | 1.41%                                                   | 30.00                            | 0.14%                                    | -                                                         |                                            |   |
|           |              | SNV             | MET       |                      |                                             |                           |                                     |                            |                                                         |                                  |                                          |                                                           |                                            |   |

| Sample ID | Cancer Type       | Gene   | Variant    | Reference      | Method                                      | Allele                    | AF         | Supporting Reads                   | Confidence Score | Other                                        |
|-----------|-------------------|--------|------------|----------------|---------------------------------------------|---------------------------|------------|------------------------------------|------------------|----------------------------------------------|
| 59        | Lung cancer       | Fusion | KIF5B:RET  | -              | -                                           | KIF5B:15:exon-RET:12:exon | cRNA - NGS | Detected - Supporting reads - 1202 | 30.00            | Supporting reads - 42 confidence score - 99  |
| 60        | Colon Cancer      | SNV    | PIK3CA     | c.1633G>A      | E545K p.(Glu545Lys)                         | cDNA - NGS                | N/A        | 0.50%                              | 30.00            | Not detected                                 |
| 61        | Lung cancer       | SNV    | TP53       | c.637C>T       | R213* p.(Arg213*)                           | cDNA - NGS                | N/A        | Not covered                        | 30.00            | Sample library preparation QC failed for HP2 |
| 62        | Lung cancer       | INDEL  | EGFR       | c.2238_2250del | E746_A750del p.(Glu746_Ala750del)           | cDNA - NGS                | N/A        | WT                                 | 30.00            | WT                                           |
| 63        | Endometrium       | SNV    | TP53       | c.733G>A       | G235R p.(Glu245Ser)                         | cDNA - PCR                | N/A        | Not covered                        | 30.00            | 0.69%                                        |
| 64        | Lung cancer       | SNV    | TP53       | c.1010G>A      | R371H p.(Arg371His)                         | cDNA - PCR                | N/A        | Not covered                        | 30.00            | 30.51%                                       |
| 65        | Colon Cancer      | SNV    | TP53       | c.817C>T       | R273C p.(Arg273Cys)                         | cDNA - PCR                | N/A        | Not covered                        | 30.00            | 31.02%                                       |
| 66        | Breast cancer     | SNV    | TP53       | c.499C>T       | D167* p.(Gln167*)                           | cDNA - PCR                | N/A        | Not covered                        | 30.00            | 3.61%                                        |
| 67        | Neuroblastoma     | MSI    | -          | -              | -                                           | MSI - High                | cDNA - PCR | MSI - High detected - Score 0.99   | 30.00            | 0.25%                                        |
| 68        | Lung cancer       | SNV    | EGFR       | -              | -                                           | -                         | cDNA - NGS | Detected - 148 reads               | 30.00            | MSI - High detected - Score 0.99             |
| 69        | Lung cancer       | Fusion | EML4-ALK   | -              | -                                           | EML4:06:exon-ALK:20:exon  | cDNA - NGS | Detected - 148 reads               | 30.00            | Not detected                                 |
| 70        | Lung cancer       | SNV    | TP53       | c.819G>A       | R273H p.(Arg273His)                         | cDNA - NGS                | 50.00      | 2.49%                              | 30.00            | Supporting reads - 57 confidence score - 99% |
| 71        | Lung cancer       | SNV    | PIK3CA     | c.1345C>A      | P449T p.(Pro449Thr)                         | cDNA - NGS                | 50.00      | 4.20%                              | 30.00            | 10.06%                                       |
| 72        | Lung cancer       | SNV    | EGFR       | c.2573T>G      | L858R p.(Leu858Arg)                         | cDNA - NGS                | 50.00      | 7.90%                              | 30.00            | Not covered                                  |
| 73        | Lung cancer       | SNV    | KRAS       | -              | -                                           | -                         | cDNA - PCR | Not covered                        | 30.00            | GAIN - Fold change - 1.82                    |
| 74        | Lung cancer       | SNV    | MET        | -              | -                                           | -                         | cDNA - PCR | Not covered                        | 30.00            | GAIN - Fold change - 1.28                    |
| 75        | Lung cancer       | SNV    | FGFR1      | -              | -                                           | -                         | cDNA - PCR | Not covered                        | 30.00            | GAIN - Fold change - 1.85                    |
| 76        | Lung cancer       | SNV    | RET        | -              | -                                           | -                         | cDNA - PCR | Not covered                        | 30.00            | GAIN - Fold change - 1.38                    |
| 77        | Colon Cancer      | Fusion | MET:MET    | -              | -                                           | MET:13:exon-MET:15:exon   | cDNA - PCR | Not covered                        | 30.00            | Supporting reads - 18 confidence score - 94% |
| 78        | Colon Cancer      | SNV    | PIK3CA     | c.1636C>G      | Q546E p.(Gln546Glu)                         | cDNA - PCR                | 61.70      | Not covered                        | 30.00            | 0.25%                                        |
| 79        | Colon Cancer      | SNV    | PTEN       | c.476G>A       | R159K p.(Arg159Lys)                         | cDNA - PCR                | 61.70      | Not covered                        | 30.00            | 0.42%                                        |
| 80        | Colon Cancer      | SNV    | KRAS       | -              | -                                           | -                         | cDNA - PCR | 0.01%                              | 30.00            | Not detected                                 |
| 81        | Colon Cancer      | SNV    | NRAS       | c.182A>T       | G61L p.(Gln61Leu)                           | cDNA - PCR                | 61.70      | 4.68%                              | 30.00            | 3.67%                                        |
| 82        | Breast cancer     | SNV    | BRAF       | c.1906C>T      | G636* p.(Gln636*)                           | cDNA - NGS                | 61.70      | 0.54                               | 30.00            | 1.36%                                        |
| 83        | Breast cancer     | SNV    | KIT        | c.710C>T       | S24F p.(Ser24Phe)                           | cDNA - NGS                | 61.70      | 0.42%                              | 30.00            | 0.60%                                        |
| 84        | Breast cancer     | SNV    | KIT        | c.1911T>C      | V64A p.(Val64Ala)                           | cDNA - NGS                | 61.70      | 0.47%                              | 30.00            | 0.69%                                        |
| 85        | Breast cancer     | SNV    | PIK3CA     | c.1624G>A      | E542K p.(Glu542Lys)                         | cDNA - PCR                | 61.70      | 15.93%                             | 30.00            | 14.93%                                       |
| 86        | Breast cancer     | SNV    | PIK3CA     | c.3012G>A      | M1004I p.(Met1004Ile)                       | cDNA - NGS                | 61.70      | 15.03%                             | 30.00            | 14.93%                                       |
| 87        | Breast cancer     | SNV    | PIK3CA     | c.3129G>A      | M1043I p.(Met1043Ile)                       | cDNA - NGS                | 61.70      | 1.28%                              | 30.00            | 1.33%                                        |
| 88        | Breast cancer     | SNV    | PTEN       | c.389G>A       | G127E p.(Gly127Glu)                         | cDNA - NGS                | 61.70      | 0.56%                              | 30.00            | 0.70%                                        |
| 89        | Breast cancer     | SNV    | PTEN       | c.5130C>C      | G171H p.(Gln171His)                         | cDNA - NGS                | 61.70      | 0.31%                              | 30.00            | 0.25%                                        |
| 90        | Breast cancer     | SNV    | TP53       | c.994-1G>C     | X332_splice                                 | cDNA - NGS                | 61.70      | 8.77%                              | 30.00            | 3.43%                                        |
| 91        | Breast cancer     | SNV    | TP53       | c.853G>A       | E289K p.(Glu289Lys)                         | cDNA - NGS                | 61.70      | 0.49%                              | 30.00            | 8.85%                                        |
| 92        | Breast cancer     | SNV    | TP53       | c.841G>C       | D281H p.(Asp281His)                         | cDNA - NGS                | 61.70      | 0.60%                              | 30.00            | 0.39%                                        |
| 93        | Breast cancer     | SNV    | TP53       | c.524G>A       | R175H p.(Arg175His)                         | cDNA - NGS                | 61.70      | 1.01%                              | 30.00            | 0.99%                                        |
| 94        | Breast cancer     | SNV    | TP53       | c.830G>A       | C277Y p.(Cys277Tyr)                         | cDNA - NGS                | 61.70      | 0.30%                              | 30.00            | 1.44%                                        |
| 95        | Breast cancer     | SNV    | HRAS       | c.436G>A       | A146T p.(Ala146Thr)                         | cDNA - NGS                | 61.70      | Not covered                        | 30.00            | 0.12%                                        |
| 96        | Breast cancer     | SNV    | ALK        | c.3824G>A      | R1275Q p.(Arg1275Gln)                       | cDNA - NGS                | 61.70      | 28.04%                             | 30.00            | 0.12%                                        |
| 97        | Breast cancer     | SNV    | FGFR1      | c.1638C>A      | N577K p.(Asn577Lys)                         | cDNA - NGS                | 61.70      | 32.95%                             | 30.00            | 0.12%                                        |
| 98        | Breast cancer     | SNV    | TP53       | c.577C>T       | H193Y p.(His193Tyr)                         | cDNA - NGS                | 61.70      | 1.42%                              | 30.00            | 35.81%                                       |
| 99        | Breast cancer     | SNV    | TP53       | c.404G>T       | G12C p.(Gly12Cys)                           | cDNA - NGS                | 61.70      | 18.30%                             | 30.00            | 0.58%                                        |
| 100       | Breast cancer     | SNV    | ERBB2      | c.336G>A       | R1030Q p.(Arg1030Gln)                       | cDNA - NGS                | 61.70      | 0.74%                              | 30.00            | 20.18%                                       |
| 101       | Breast cancer     | SNV    | PIK3CA     | c.1633G>A      | E545K p.(Glu545Lys)                         | cDNA - NGS                | 61.70      | Not detected                       | 30.00            | 0.81%                                        |
| 102       | Breast cancer     | SNV    | EGFR       | -              | -                                           | -                         | cDNA - PCR | 0.05%                              | 30.00            | 0.16%                                        |
| 103       | Breast cancer     | SNV    | EGFR       | -              | -                                           | -                         | cDNA - PCR | Not covered                        | 30.00            | 0.15%                                        |
| 104       | Breast cancer     | SNV    | ERBB2      | -              | -                                           | -                         | cDNA - NGS | GAIN - 3.68 Copies                 | 30.00            | GAIN - Fold change - 1.33                    |
| 105       | Breast cancer     | SNV    | BRAF       | -              | -                                           | -                         | cDNA - NGS | Not covered                        | 30.00            | GAIN - Fold change - 1.24                    |
| 106       | Breast cancer     | SNV    | MET        | -              | -                                           | -                         | cDNA - PCR | GAIN - 3.68 Copies                 | 30.00            | GAIN - Fold change - 1.36                    |
| 107       | Breast cancer     | SNV    | TP53       | c.712T>C       | C238R p.(Cys238Arg)                         | cDNA - PCR                | 61.70      | Not covered                        | 30.00            | Not covered                                  |
| 108       | Breast cancer     | SNV    | EGFR       | c.2573T>G      | L858R p.(Leu858Arg)                         | cDNA - PCR                | 61.70      | 54.30%                             | 30.00            | 0.37%                                        |
| 109       | Breast cancer     | SNV    | KEAP1      | c.1531-2T>G    | X511_splice                                 | cDNA - PCR                | 61.70      | Not covered                        | 30.00            | 9.67%                                        |
| 110       | Breast cancer     | SNV    | TP53       | c.375G>T       | X125_splice p.(Thr125=)                     | cDNA - PCR                | 61.70      | Not covered                        | 30.00            | 1.09%                                        |
| 111       | Breast cancer     | SNV    | KRAS       | c.348G>T       | G12C p.(Gly12Cys)                           | cDNA - PCR                | 61.70      | 7.60%                              | 30.00            | 0.01%                                        |
| 112       | Breast cancer     | SNV    | TP53       | c.730G>T       | G234G p.(Glu244Glu)                         | FFPE - NGS                | 61.70      | 14.93%                             | 30.00            | 1.68%                                        |
| 113       | Breast cancer     | SNV    | TP53       | c.524G>A       | R175H p.(Arg175His)                         | FFPE - NGS                | 61.70      | 17.00%                             | 30.00            | 1.20%                                        |
| 114       | Breast cancer     | SNV    | KRAS       | c.35G>C        | G12A p.(Gly12Ala)                           | cDNA - PCR                | 61.70      | 1.30%                              | 30.00            | 1.69%                                        |
| 115       | Breast cancer     | SNV    | MAP2K1     | c.129T>G       | D43E p.(Asp43Glu)                           | cDNA - PCR                | 61.70      | Not covered                        | 30.00            | 0.20%                                        |
| 116       | Breast cancer     | SNV    | EGFR       | c.2573T>G      | L858R p.(Leu858Arg)                         | cDNA - PCR                | 61.70      | 11.1%                              | 30.00            | 11.25%                                       |
| 117       | Breast cancer     | SNV    | EGFR       | c.249T>G       | L83V p.(Leu83Val)                           | FFPE - NGS                | 61.70      | Not detected                       | 30.00            | 8.97%                                        |
| 118       | Breast cancer     | SNV    | PIK3CA     | c.1624G>A      | E542K p.(Glu542Lys)                         | FFPE - NGS                | 61.70      | 17%                                | 30.00            | Not detected                                 |
| 119       | Breast cancer     | SNV    | PIK3CA     | c.1633G>A      | E545K p.(Glu545Lys)                         | FFPE - NGS                | 61.70      | Not detected                       | 30.00            | 0.39%                                        |
| 120       | Breast cancer     | SNV    | TP53       | c.849C>T       | G317* p.(Gln317*)                           | FFPE - NGS                | 61.70      | 8%                                 | 30.00            | 3.29%                                        |
| 121       | Breast cancer     | SNV    | TP53       | c.396G>C       | K132N p.(Lys132Asn)                         | FFPE - NGS                | 61.70      | Not detected                       | 30.00            | 0.27%                                        |
| 122       | Breast cancer     | SNV    | ERBB2      | c.336G>A       | R1030Q p.(Arg1030Gln)                       | FFPE - NGS                | 61.70      | Not detected                       | 30.00            | 0.14%                                        |
| 123       | Breast cancer     | INDEL  | EGFR       | c.2238_2250del | E746_A750del p.(Glu746_Ala750del)           | cDNA - PCR                | 61.70      | 0.05%                              | 30.00            | Not detected                                 |
| 124       | Breast cancer     | SNV    | EGFR       | c.2369C>T      | T790M p.(Thr790Met)                         | cDNA - PCR                | 61.70      | 0.03%                              | 30.00            | Not detected                                 |
| 125       | Breast cancer     | SNV    | TP53       | c.427G>A       | V143M p.(Val143Met)                         | cDNA - PCR                | 61.70      | Not covered                        | 30.00            | 0.15%                                        |
| 126       | Breast cancer     | INDEL  | EGFR       | c.2240_2257del | L747_P753delinsP p.(Leu747_Pro753delinsSer) | cDNA - PCR                | 61.70      | 17.70%                             | 30.00            | 7.96%                                        |
| 127       | Breast cancer     | SNV    | RET        | c.2045C>A      | A682D p.(Ala682Asp)                         | cDNA - PCR                | 61.70      | Not covered                        | 30.00            | 1.41%                                        |
| 128       | Breast cancer     | SNV    | GNAS       | c.602G>A       | R201H p.(Arg201His)                         | cDNA - PCR                | 61.70      | Not covered                        | 30.00            | 3.68%                                        |
| 129       | Breast cancer     | SNV    | KRAS       | c.35G>T        | G12V p.(Gly12Val)                           | cDNA - PCR                | 61.70      | 6.40%                              | 30.00            | 6.48%                                        |
| 130       | Breast cancer     | SNV    | STRK11     | c.721G>C       | A241P p.(Ala241Pro)                         | FFPE - NGS                | 61.70      | 49%                                | 30.00            | 2.11%                                        |
| 131       | Breast cancer     | SNV    | KRAS       | c.35G>A        | G12V p.(Gly12Val)                           | cDNA - PCR                | 61.70      | 26%                                | 30.00            | 23.1%                                        |
| 132       | Breast cancer     | SNV    | BRAF       | c.1798T>A      | V600E p.(Val600Glu)                         | cDNA - PCR                | 61.70      | 0.72%                              | 30.00            | 0.20%                                        |
| 133       | Breast cancer     | SNV    | TP53       | c.849G>C       | R283P p.(Arg283Pro)                         | FFPE - NGS                | 61.70      | 2%                                 | 30.00            | 0.47%                                        |
| 134       | Breast cancer     | SNV    | TP53       | c.455C>T       | P152L p.(Pro152Leu)                         | FFPE - NGS                | 61.70      | Not detected                       | 30.00            | 0.13%                                        |
| 135       | Breast cancer     | SNV    | TP53       | c.96+1G>A      | X32_splice                                  | FFPE - NGS                | 61.70      | Not detected                       | 30.00            | 2.70%                                        |
| 136       | Breast cancer     | Fusion | ALK:ALK    | -              | -                                           | ALK:15:exon-ALK:20:exon   | FFPE - NGS | Detected - VAF - 82%               | 30.00            | Supporting reads - 270 confidence score - 89 |
| 137       | Breast cancer     | Fusion | FGFR2:TREC | -              | -                                           | FGFR2:18:exon-TREC:2:exon | FFPE - NGS | Detected - VAF - 60%               | 30.00            | Supporting reads - 439 confidence score - 69 |
| 138       | Breast cancer     | INDEL  | FGFR2      | c.543dup       | G182Rn*18 p.(Gly182Asp*18)                  | FFPE - NGS                | 61.70      | 15%                                | 30.00            | Not detected                                 |
| 139       | Breast cancer     | Fusion | CCDC6:RET  | -              | -                                           | CCDC6:08:exon-RET:12:exon | FFPE - NGS | Not covered                        | 30.00            | Supporting reads - 12 confidence score - 74  |
| 140       | Breast cancer     | SNV    | TP53       | c.736A>G       | M248I p.(Met248Ile)                         | FFPE - NGS                | 61.70      | 2.20%                              | 30.00            | 0.60%                                        |
| 141       | Breast cancer     | SNV    | IDH1       | c.394C>T       | R132C p.(Arg132Cys)                         | FFPE - NGS                | 61.70      | 1.51%                              | 30.00            | 0.57%                                        |
| 142       | Breast cancer     | INDEL  | EGFR       | c.2231_2319dup | N771_H773dup p.(Asn771_His773dup)           | FFPE - NGS                | 61.70      | 6.50%                              | 30.00            | 3.83%                                        |
| 143       | Breast cancer     | INDEL  | EGFR       | c.2238_2249del | E746_A750del p.(Glu746_Ala750del)           | FFPE - NGS                | 61.70      | 3.40%                              | 30.00            | 0.45%                                        |
| 144       | Breast cancer     | SNV    | EGFR       | c.2398T>A      | C797S p.(Cys797Ser)                         | FFPE - NGS                | 61.70      | 17.10%                             | 30.00            | 0.90%                                        |
| 145       | Primitive unknown | SNV    | KRAS       | c.35G>A        | G12Dp.(Gly12Asp)                            | FFPE - NGS                | 61.70      | 3.70%                              | 30.00            | 1.45%                                        |
| 146       | Lung cancer       | Fusion | CD74:ROS1  | -              | -                                           | CD74:06:exon-ROS1:35:exon | FFPE - NGS | Detected - VAF - 86%               | 15.00            | Detected - VAF - 0.2%                        |
| 147       | Colon Cancer      | SNV    | TP53       | c.472C>T       | R158C p.(Arg158Cys)                         | FFPE - NGS                | 61.70      | Not detected                       | 10.00            | 0.21%                                        |
| 148       | Colon Cancer      | SNV    | KRAS       | c.436G>A       | A146T p.(Ala146Thr)                         | FFPE - NGS                | 61.70      | 2.70%                              | 10.00            | Not detected                                 |
| 149       | Colon Cancer      | SNV    | GNAS       | c.601C>T       | R201C p.(Arg201Cys)                         | FFPE - NGS                | 61.70      | Not covered                        | 10.00            | 4.92%                                        |
| 150       | Colon Cancer      | SNV    | FGFR1      | -              | -                                           | -                         | cDNA - PCR | Not covered                        | 10.00            | GAIN - Fold change - 1.2                     |
| 151       | Colon Cancer      | SNV    | RET        | -              | -                                           | -                         | cDNA - PCR | Not covered                        | 10.00            | GAIN - Fold change - 1.3                     |
| 152       | Colon Cancer      | SNV    | TP53       | c.814G>A       | V272M p.(Val272Met)                         | FFPE - NGS                | 61.70      | Detected only in tissue by FISH    | 15.00            | Not detected                                 |
| 153       | Breast cancer     | SNV    | FGFR2      | -              | -                                           | -                         | cDNA - PCR | Not covered                        | 10.00            | 48.80%                                       |
| 154       | Breast cancer     | SNV    | PIK3CA     | c.1636C>G      | Q546K p.(Gln546Lys)                         | FFPE - NGS                | 14.30      | 11%                                | 10.00            | GAIN - Fold change - 2.45                    |
| 155       | Breast cancer     | SNV    | TP53       | c.659A>G       | Y220C p.(Tyr220Cys)                         | FFPE - NGS                | 14.30      | 12.7%                              | 10.00            | 13.40%                                       |
| 156       | Breast cancer     | SNV    | FGFR1      | -              | -                                           | -                         | cDNA - PCR | Not covered                        | 10.00            | GAIN - Fold change - 1.43                    |
| 157       | Breast cancer     | SNV    | ESR1       | c.1607T>C      | L538P p.(Leu538Pro)                         | FFPE - NGS                | 4.10       | Not detected                       | 10.00            | 0.47%                                        |
| 158       | Breast cancer     | SNV    | ESR1       | c.1608T>A      | Y537N p.(Tyr537Asn)                         | FFPE - NGS                | 4.10       | 0.50%                              | 10.00            | 1.02%                                        |
| 159       |                   |        |            |                |                                             |                           |            |                                    |                  |                                              |

|       |                   | CNV               | EGFR                              | -                     | -                                                  | Copy number gain        | cDNA - NGS       |                           | CNV Score - 1.17 |                                                      | Not detected | Score reported by orthogonal test is too low for confident reporting of CNV |                                                                             |
|-------|-------------------|-------------------|-----------------------------------|-----------------------|----------------------------------------------------|-------------------------|------------------|---------------------------|------------------|------------------------------------------------------|--------------|-----------------------------------------------------------------------------|-----------------------------------------------------------------------------|
| 94    | Prostate cancer   | SNV               | ALK                               | c.3637C>A             | P1213T p.(Pro1213Thr)                              |                         | cDNA - NGS       |                           | 0.10%            |                                                      | 0.14%        |                                                                             |                                                                             |
|       |                   | SNV               | TP53                              | c.578A>G              | H193R p.(His193Arg)                                |                         | cDNA - NGS       | 36.80                     | 0.11%            | 23.20                                                | Not detected | Low ng starting input for HP2 in library preparation                        |                                                                             |
| 95    | Melanoma          | SNV               | GNAQ                              | c.626A>T              | G209L p.(Gln209Leu)                                |                         | cDNA - NGS       |                           | 0.38%            |                                                      | 0.39%        |                                                                             |                                                                             |
|       |                   | SNV               | KEAP1                             | c.1108T>C             | V369A p.(Val369Ala)                                |                         | cDNA - NGS       | 50.00                     | 48.24%           | 30.00                                                | 48.94%       | -                                                                           |                                                                             |
|       |                   | SNV               | GNAS                              | c.602G>A              | R201H p.(Arg201His)                                |                         | cDNA - NGS       |                           | Not detected     |                                                      | 0.45%        | -                                                                           |                                                                             |
| 96    | Pancreatic cancer | Negative          | -                                 | -                     | WT                                                 |                         | cDNA - NGS       | 31.20                     |                  | 21.40                                                | WT           | -                                                                           |                                                                             |
| 97    | Breast cancer     | SNV               | ESR1                              | c.1613A>G             | D538G p.(Asp538Gly)                                |                         | cDNA - NGS       | 50.00                     | 0.12%            | 30.00                                                | 0.24%        | -                                                                           |                                                                             |
| 98    | Breast cancer     | SNV               | PIK3CA                            | c.1633G>A             | E545K p.(Glu545Lys)                                |                         | cDNA - NGS       | 50.00                     | 0.15%            | 30.00                                                | Not detected | -                                                                           |                                                                             |
| 99    | Breast cancer     | SNV               | FGFR3                             | c.2150G>A             | A171D p.(Asp171Asp)                                |                         | cDNA - NGS       | 41.40                     | 43.78%           | 24.90                                                | 43.58%       | -                                                                           |                                                                             |
| 100   | Breast cancer     | SNV               | PIK3CA                            | c.1133G>A             | R39H p.(Arg39His)                                  |                         | cDNA - NGS       |                           | 2.50%            |                                                      | 2.62%        | -                                                                           |                                                                             |
|       |                   | SNV               | TP53                              | c.746G>T              | R249M p.(Arg249Met)                                |                         | cDNA - NGS       |                           | 53.18%           |                                                      | 57.29%       | -                                                                           |                                                                             |
|       |                   | SNV               | EGFR                              | c.3115-1G>A           | X1039_splice                                       |                         | cDNA - NGS       |                           | 2.63%            |                                                      | 2.86%        | -                                                                           |                                                                             |
|       |                   | SNV               | BRAF                              | c.2221G>C             | E741Q p.(Glu741Gln)                                |                         | cDNA - NGS       |                           | 1.64%            |                                                      | 0.72%        | -                                                                           |                                                                             |
|       |                   | SNV               | FGFR2                             | c.558G>A              | M189I p.(Met189Ile)                                |                         | cDNA - NGS       |                           | 0.73%            |                                                      | 1.06%        | -                                                                           |                                                                             |
|       |                   | SNV               | KEAP1                             | c.1081G>T             | P361S p.(Pro361Ser)                                |                         | cDNA - NGS       |                           | 1.50%            |                                                      | 1.17%        | -                                                                           |                                                                             |
|       |                   | SNV               | RET                               | c.2165A>T             | K722M p.(Lys722Met)                                |                         | cDNA - NGS       |                           | 5.46%            |                                                      | 4.33%        | -                                                                           |                                                                             |
|       |                   | CNV               | ERBB2                             | -                     | -                                                  |                         | Copy number gain | cDNA - NGS                | 50.00            | CNV Score - 4.32                                     | 30.00        | Not detected                                                                | Score reported by orthogonal test is too low for confident reporting of CNV |
|       |                   | CNV               | EGFR                              | -                     | -                                                  |                         | Copy number gain | cDNA - NGS                |                  | CNV Score - 4.16                                     |              | Not detected                                                                | Score reported by orthogonal test is too low for confident reporting of CNV |
|       |                   | CNV               | FGFR1                             | -                     | -                                                  |                         | Copy number gain | cDNA - NGS - low pass WGS |                  | Not covered by Lbx kit but confirmed in low pass WGS |              | GAIN - Fold change - 1.29                                                   | -                                                                           |
|       |                   | CNV               | NRAS                              | -                     | -                                                  |                         | Copy number loss | cDNA - NGS                |                  | Not covered                                          |              | LOSS - Fold change - 0.68                                                   | -                                                                           |
|       |                   | CNV               | RET                               | -                     | -                                                  |                         | Copy number loss | cDNA - NGS                |                  | Not covered                                          |              | LOSS - Fold change - 0.81                                                   | -                                                                           |
| CNV   | TP53              | -                 | -                                 |                       | Copy number loss                                   | cDNA - NGS              |                  | Not covered               |                  | LOSS - Fold change - 0.82                            | -            |                                                                             |                                                                             |
| 101   | Breast cancer     | SNV               | PIK3CA                            | c.3140A>G             | H1047R p.(His1047Arg)                              |                         | cDNA - NGS       |                           | Not detected     |                                                      | 0.21%        | -                                                                           |                                                                             |
|       |                   | SNV               | TP53                              | c.374C>A              | T129K p.(Thr129Lys)                                |                         | cDNA - NGS       |                           | 0.42%            |                                                      | 1.49%        | -                                                                           |                                                                             |
|       |                   | SNV               | ROS1                              | c.4482C>G             | L1488V p.(Leu1488Val)                              |                         | cDNA - NGS       | 50.00                     | 0.32%            | 30.00                                                | Not covered  | -                                                                           |                                                                             |
|       |                   | Fusion            | ALK/ALK                           | -                     | -                                                  | ALK:10:exon-ALK:20:exon |                  | cDNA - NGS                |                  | Not detected                                         |              | Supporting reads - 7 confidence score - 64%                                 | -                                                                           |
| 102   | Breast cancer     | SNV               | PIK3CA                            | c.3140A>G             | H1047R p.(His1047Arg)                              |                         | cDNA - NGS       |                           | 48.48%           |                                                      | 53.11%       | -                                                                           |                                                                             |
|       |                   | SNV               | ESR1                              | c.1609T>A             | Y537N p.(Tyr537Asn)                                |                         | cDNA - NGS       |                           | 50.50%           |                                                      | 56.21%       | -                                                                           |                                                                             |
|       |                   | SNV               | PIK3CA                            | c.1232G>A             | R401Q p.(Arg401Gln)                                |                         | cDNA - NGS       |                           | Not detected     |                                                      | 0.32%        | -                                                                           |                                                                             |
|       |                   | SNV               | ESR1                              | c.1133C>A             | L379I p.(Leu379Ile)                                |                         | cDNA - NGS       |                           | 11.82%           |                                                      | 18.82%       | -                                                                           |                                                                             |
|       |                   | SNV               | ESR1                              | c.1278C>A             | D426E p.(Asp426Glu)                                |                         | cDNA - NGS       |                           | 3.90%            |                                                      | 2.22%        | -                                                                           |                                                                             |
|       |                   | SNV               | ESR1                              | c.1068A>G             | M357V p.(Met357Val)                                |                         | cDNA - NGS       |                           | 1.07%            |                                                      | Not covered  | -                                                                           |                                                                             |
|       |                   | SNV               | ESR1                              | c.1613A>G             | D538G p.(Asp538Gly)                                |                         | cDNA - NGS       | 50.00                     | 0.42%            | 30.00                                                | Not detected | -                                                                           |                                                                             |
|       |                   | CNV               | ERBB2                             | -                     | -                                                  |                         | Copy number gain | cDNA - NGS                |                  | CNV Score - 7.48                                     |              | GAIN - Fold change - 1.48                                                   | -                                                                           |
|       |                   | CNV               | FGFR1                             | -                     | -                                                  |                         | Copy number gain | cDNA - NGS                |                  | Not covered                                          |              | GAIN - Fold change - 3.13                                                   | -                                                                           |
|       |                   | CNV               | PIK3CA                            | -                     | -                                                  |                         | Copy number gain | cDNA - NGS                |                  | Not covered                                          |              | GAIN - Fold change - 1.11                                                   | -                                                                           |
|       |                   | CNV               | RET                               | -                     | -                                                  |                         | Copy number gain | cDNA - NGS                |                  | Not covered                                          |              | GAIN - Fold change - 1.56                                                   | -                                                                           |
|       |                   | CNV               | NRAS                              | -                     | -                                                  |                         | Copy number loss | cDNA - NGS                |                  | Not covered                                          |              | LOSS - Fold change - 0.81                                                   | -                                                                           |
| CNV   | TP53              | -                 | -                                 |                       | Copy number loss                                   | cDNA - NGS              |                  | Not covered               |                  | LOSS - Fold change - 0.91                            | -            |                                                                             |                                                                             |
| 103   | Breast cancer     | SNV               | PIK3CA                            | c.3140A>G             | H1047R p.(His1047Arg)                              |                         | cDNA - NGS       |                           | 25.13%           |                                                      | 26.27%       | -                                                                           |                                                                             |
|       |                   | SNV               | TP53                              | c.773G>A              | G732N p.(Arg732Asn)                                |                         | cDNA - NGS       |                           | Not detected     |                                                      | 0.32%        | -                                                                           |                                                                             |
|       |                   | SNV               | ESR1                              | c.1607T>G             | L538I p.(Leu538Arg)                                |                         | cDNA - NGS       |                           | 0.34%            |                                                      | 0.59%        | -                                                                           |                                                                             |
|       |                   | SNV               | ESR1                              | c.1610A>C             | Y537S p.(Tyr537Ser)                                |                         | cDNA - NGS       |                           | 1.25%            |                                                      | 1.28%        | -                                                                           |                                                                             |
|       |                   | SNV               | ESR1                              | c.1613A>G             | D538G p.(Asp538Gly)                                |                         | cDNA - NGS       |                           | 0.45%            |                                                      | 0.76%        | -                                                                           |                                                                             |
|       |                   | SNV               | ESR1                              | c.1609T>A             | Y537N p.(Tyr537Asn)                                |                         | cDNA - NGS       | 50.00                     | 0.36%            | 30.00                                                | 0.47%        | -                                                                           |                                                                             |
|       |                   | SNV               | ESR1                              | c.1607T>A             | L538I p.(Leu538Arg)                                |                         | cDNA - NGS       |                           | 0.13%            |                                                      | 0.18%        | -                                                                           |                                                                             |
|       |                   | SNV               | ESR1                              | c.1607T>C             | L538I p.(Leu538Pro)                                |                         | cDNA - NGS       |                           | 0.22%            |                                                      | 0.24%        | -                                                                           |                                                                             |
|       |                   | SNV               | STK11                             | c.440G>A              | R147H p.(Arg147His)                                |                         | cDNA - NGS       |                           | 7.96%            |                                                      | 11.76%       | -                                                                           |                                                                             |
|       |                   | INDEL             | PIK3CA                            | c.2173_2176delinsAATA | D725_E726delinsAATA (p.Arg725_Leu726delinsAAsnLys) |                         | cDNA - NGS       |                           | Not covered      |                                                      | 16.07%       | -                                                                           |                                                                             |
|       |                   | SNV               | ESR1                              | c.1138C>G             | G1038R p.(Glu1038Arg)                              |                         | cDNA - NGS       |                           | 0.09%            |                                                      | Not detected | VAF < 0.1%                                                                  |                                                                             |
|       |                   | INDEL             | EGFR                              | c.2235_2249del        | E746_A750del p.(Glu746_Ala750del)                  |                         | cDNA - NGS - CGP | 50.00                     | 2.10%            | 30.00                                                | Not detected | -                                                                           |                                                                             |
| SNV   | EGFR              | c.2399T>A         | C797S p.(Cys797Ser)               |                       | cDNA - NGS - CGP                                   |                         | 1.90%            |                           | 1.77%            | -                                                    |              |                                                                             |                                                                             |
| INDEL | EGFR              | c.2235_2249del    | E746_A750del p.(Glu746_Ala750del) |                       | cDNA - NGS - CGP                                   |                         | 16.80%           |                           | 13.67%           | -                                                    |              |                                                                             |                                                                             |
| SNV   | PIK3CA            | c.1624G>A         | E542K p.(Glu542Lys)               |                       | cDNA - NGS - CGP                                   |                         | 0.26%            |                           | 0.35%            | -                                                    |              |                                                                             |                                                                             |
| SNV   | PIK3CA            | c.1633G>A         | E545K p.(Glu545Lys)               |                       | cDNA - NGS - CGP                                   | 50.00                   | 0.70%            | 30.00                     | 0.37%            | -                                                    |              |                                                                             |                                                                             |
| SNV   | ERBB2             | c.5474T>T         | G732N p.(Arg732Asn)               |                       | cDNA - NGS - CGP                                   |                         | 1.90%            |                           | 1.07%            | -                                                    |              |                                                                             |                                                                             |
| SNV   | PTEN              | c.287C>A          | P96Q p.(Pro96Gln)                 |                       | cDNA - NGS - CGP                                   |                         | 0.18%            |                           | Not detected     | -                                                    |              |                                                                             |                                                                             |
| SNV   | TP53              | c.455C>T          | P152L p.(Pro152Leu)               |                       | cDNA - NGS - CGP                                   |                         | 4.90%            |                           | 7.29%            | -                                                    |              |                                                                             |                                                                             |
| SNV   | EGFR              | c.2573T>G         | L858R p.(Leu858Arg)               |                       | cDNA - NGS - CGP                                   | 50.00                   | 0.13%            | 30.00                     | Not detected     | -                                                    |              |                                                                             |                                                                             |
| SNV   | TP53              | c.749C>T          | P250L p.(Pro250Leu)               |                       | cDNA - NGS - CGP                                   |                         | 0.07%            |                           | 0.15%            | -                                                    |              |                                                                             |                                                                             |
| INDEL | EGFR              | c.2235_2249del    | E746_A750del p.(Glu746_Ala750del) |                       | cDNA - NGS - CGP                                   |                         | 0.10%            |                           | 0.34%            | -                                                    |              |                                                                             |                                                                             |
| SNV   | ERBB2             | c.5254T>C         | G732S p.(Arg732Ser)               |                       | cDNA - NGS - CGP                                   | 50.00                   | Not detected     | 27.30                     | 0.16%            | -                                                    |              |                                                                             |                                                                             |
| SNV   | TP53              | c.730G>A          | G245S p.(Gly245Ser)               |                       | cDNA - NGS - CGP                                   |                         | 0.22%            |                           | 0.19%            | -                                                    |              |                                                                             |                                                                             |
| INDEL | EGFR              | c.2235_2249del    | E746_A750del p.(Glu746_Ala750del) |                       | cDNA - NGS - CGP                                   | 50.00                   | Not detected     | 24.50                     | 0.14%            | -                                                    |              |                                                                             |                                                                             |
| INDEL | EGFR              | c.2235_2249del    | E746_A750del p.(Glu746_Ala750del) |                       | cDNA - NGS - CGP                                   |                         | 4.20%            |                           | 3.86%            | -                                                    |              |                                                                             |                                                                             |
| SNV   | TP53              | c.1182A>G         | p.394WexT9                        |                       | cDNA - NGS - CGP                                   | 50.00                   | 0.21%            | 30.00                     | Not detected     | -                                                    |              |                                                                             |                                                                             |
| SNV   | TP53              | c.473G>A          | p.R158H                           |                       | cDNA - NGS - CGP                                   |                         | 0.11%            |                           | Not detected     | -                                                    |              |                                                                             |                                                                             |
| SNV   | TP53              | c.810G>T          | R273M p.(Arg273Met)               |                       | cDNA - NGS - CGP                                   |                         | 1.00%            |                           | 1.00%            | -                                                    |              |                                                                             |                                                                             |
| SNV   | ERBB2             | c.309G>A          | R103Q p.(Arg103Gln)               |                       | cDNA - NGS - CGP                                   |                         | Not detected     |                           | 0.13%            | -                                                    |              |                                                                             |                                                                             |
| SNV   | PIK3CA            | c.241G>A          | E81K p.(Glu81Lys)                 |                       | cDNA - NGS - CGP                                   |                         | Not detected     |                           | 0.12%            | -                                                    |              |                                                                             |                                                                             |
| SNV   | RET               | c.2092G>C         | D698H p.(Asp698His)               |                       | cDNA - NGS - CGP                                   | 50.00                   | 0.40%            | 30.00                     | 0.42%            | -                                                    |              |                                                                             |                                                                             |
| SNV   | IDH2              | c.418C>T          | p.R140W                           |                       | cDNA - NGS - CGP                                   |                         | 0.20%            |                           | Not detected     | -                                                    |              |                                                                             |                                                                             |
| SNV   | TP53              | c.469G>T          | V157F p.(Val157Phe)               |                       | cDNA - NGS - CGP                                   |                         | 5.50%            |                           | 6.67%            | -                                                    |              |                                                                             |                                                                             |
| SNV   | EGFR              | c.2573T>G         | L858R p.(Leu858Arg)               |                       | cDNA - NGS - CGP                                   |                         | 0.72%            |                           | 0.30%            | -                                                    |              |                                                                             |                                                                             |
| SNV   | ALK               | c.338G>A          | E1129K p.(Glu1129Lys)             |                       | cDNA - NGS - CGP                                   |                         | Not detected     |                           | 0.33%            | -                                                    |              |                                                                             |                                                                             |
| SNV   | PIK3CA            | c.1633G>A         | E545K p.(Glu545Lys)               |                       | cDNA - NGS - CGP                                   | 50.00                   | 0.76%            | 8.40                      | Not detected     | Low ng starting input for HP2 in library preparation |              |                                                                             |                                                                             |
| SNV   | PDGFRA            | c.2482T>A         | R817N p.(Ile817Asn)               |                       | cDNA - NGS - CGP                                   |                         | Not detected     |                           | 0.29%            | -                                                    |              |                                                                             |                                                                             |
| INDEL | EGFR              | c.2235_2249del    | E746_A750del p.(Glu746_Ala750del) |                       | cDNA - NGS - CGP                                   | 50.00                   | 2.10%            | 30.00                     | 1.72%            | -                                                    |              |                                                                             |                                                                             |
| INDEL | TP53              | c.816T>G          | R273S p.(Arg273Ser)               |                       | cDNA - NGS - CGP                                   |                         | 2.10%            |                           | 1.72%            | -                                                    |              |                                                                             |                                                                             |
| INDEL | EGFR              | c.2235_2249del    | E746_A750del p.(Glu746_Ala750del) |                       | cDNA - NGS - CGP                                   |                         | 1.80%            |                           | 1.16%            | -                                                    |              |                                                                             |                                                                             |
| INDEL | FGFR1             | c.396_398del      | D166del p.(Asp133del)             |                       | cDNA - NGS - CGP                                   |                         | Not detected     |                           | 0.25%            | -                                                    |              |                                                                             |                                                                             |
| SNV   | ERBB2             | c.2780G>T         | E930D p.(Glu930Asp)               |                       | cDNA - NGS - CGP                                   | 50.00                   | 50.10%           | 12.60                     | 50.0%            | -                                                    |              |                                                                             |                                                                             |
| INDEL | TP53              | c.823del          | C275Vfs*70 p.(Cys275Valfs*70)     |                       | cDNA - NGS - CGP                                   |                         | 0.80%            |                           | 1.15%            | -                                                    |              |                                                                             |                                                                             |
| CNV   | FGFR3             | -                 | -                                 |                       | Copy number gain                                   | cDNA - NGS - CGP        |                  | GAIN - Fold change - 1.4  |                  | GAIN - Fold change - 1.24                            | -            |                                                                             |                                                                             |
| CNV   | PIK3CA            | -                 | -                                 |                       | Copy number gain                                   | cDNA - NGS - CGP        |                  | fold change 1.353         |                  | Not detected                                         | -            |                                                                             |                                                                             |
| CNV   | BRAF              | -                 | -                                 |                       | Copy number gain                                   | cDNA - NGS - CGP        |                  | fold change 1.233         |                  | Not detected                                         | -            |                                                                             |                                                                             |
| INDEL | EGFR              | c.2235_2250del    | E746_A750del p.(Glu746_Ala750del) |                       | cDNA - NGS - CGP                                   | 50.00                   | 19.40%           | 30.00                     | 17.76%           | -                                                    |              |                                                                             |                                                                             |
| SNV   | TP53              | c.742C>T          | R248W p.(Arg248Trp)               |                       | cDNA - NGS - CGP                                   |                         | 22.80%           |                           | 20.23%           | -                                                    |              |                                                                             |                                                                             |
| SNV   | TP53              | c.376-1G>T        | X126_splice                       |                       | cDNA - NGS - CGP                                   |                         | Not detected     |                           | 0.31%            | -                                                    |              |                                                                             |                                                                             |
| SNV   | BRAF              | c.1799T>A         | V600E p.(Val600Glu)               |                       | cDNA - NGS - CGP                                   |                         | 0.90%            |                           | Not detected     | -                                                    |              |                                                                             |                                                                             |
| SNV   | PIK3CA            | c.344G>A          | R115Q p.(Arg115Gln)               |                       | cDNA - NGS - CGP                                   |                         | Not detected     |                           | 0.30%            | -                                                    |              |                                                                             |                                                                             |
| SNV   | BRAF              | c.1799T>A         | V600E p.(Val600Glu)               |                       | cDNA - NGS - CGP                                   | 50.00                   | 0.39%            | 30.00                     | 0.21%            | -                                                    |              |                                                                             |                                                                             |
| SNV   | EGFR              | c.2573T>G         | L858R p.(Leu858Arg)               |                       | cDNA - NGS - CGP                                   |                         | 1.40%            |                           | 1.05%            | -                                                    |              |                                                                             |                                                                             |
| SNV   | TP53              | c.524G>A          | R175H p.(Arg175His)               |                       | cDNA - NGS - CGP                                   |                         | Not detected     |                           | 0.14%            | -                                                    |              |                                                                             |                                                                             |
| SNV   | TP53              | c.827C>A          | A276D p.(Ala276Asp)               |                       | cDNA - NGS - CGP                                   | 50.00                   | Not detected     | 30.00                     | 0.13%            | -                                                    |              |                                                                             |                                                                             |
| INDEL | TP53              | c.826_827delinsAA | A276N p.(Ala276Asn)               |                       | cDNA - NGS - CGP                                   |                         | Not detected     |                           | 2.38%            | -                                                    |              |                                                                             |                                                                             |
| CNV   | FGFR3             | -                 | -                                 |                       | Copy number gain                                   | cDNA - NGS - CGP        |                  | fold change 1.173         |                  | Not detected                                         | -            |                                                                             |                                                                             |
| SNV   | FGFR2             | c.1085C>T         | A362V p.(Ala362Val)               |                       | cDNA - NGS - CGP                                   |                         | Not detected     |                           | 0.38%            | -                                                    |              |                                                                             |                                                                             |
| SNV   | EGFR              | c.2573T>G         | L858R p.(Leu858Arg)               |                       | cDNA - NGS - CGP                                   | 50.00                   | 0.40%            | 7.32                      | Not detected     | Low ng starting input for HP2 in library preparation |              |                                                                             |                                                                             |
| SNV   | MARCK1            | c.631G>A          | V211I p.(Val211Ile)               |                       | cDNA - NGS - CGP                                   |                         | Not detected     |                           | 0.45%            | -                                                    |              |                                                                             |                                                                             |
| SNV   | TP53              | c.838A>G          | R280Q p.(Arg280Gln)               |                       | cDNA - NGS - CGP                                   |                         | Not detected     |                           | 0.47%            | -                                                    |              |                                                                             |                                                                             |
| SNV   | EGFR              | c.2573T>G         | L858R p.(Leu858Arg)               |                       | cDNA - NGS                                         |                         | 74.86%           |                           | 74.26%           | -                                                    |              |                                                                             |                                                                             |
| SNV   | TP53              | c.733G>A          | G245S p.(Gly245Ser)               |                       | cDNA - NGS                                         |                         | 32.02%           |                           | 29.32%           | -                                                    |              |                                                                             |                                                                             |
| CNV   | PIK3CA            | -                 | -                                 |                       | Copy number gain                                   | cDNA - NGS              |                  | Not covered               |                  | GAIN - Fold change - 1.22                            | -            |                                                                             |                                                                             |
| CNV   | EGFR              | -                 | -                                 |                       | Copy number gain                                   | cDNA - NGS              |                  | CNV Score - 9.96          |                  | GAIN - Fold change - 3.3                             | -            |                                                                             |                                                                             |
| CNV   | ERBB2             | -                 | -                                 |                       | Copy number gain                                   | cDNA - NGS              |                  | CNV Score - 8.48          |                  | Not detected                                         | -            |                                                                             |                                                                             |
| SNV   | MET               | c.1279G>A         | V427I p.(Val427Ile)               |                       | cDNA - NGS                                         | 50.00                   | 0.86%            | 30.00                     | 0.41%            | -                                                    |              |                                                                             |                                                                             |
| SNV   | NTRK1             | c.1               |                                   |                       |                                                    |                         |                  |                           |                  |                                                      |              |                                                                             |                                                                             |

| Sample ID                 | Cancer Type                                 | Variant                   | Gene                                        | Effect                   | Method           | Value                 | Confidence | Supporting Reads                                                            | Other                                                                       |
|---------------------------|---------------------------------------------|---------------------------|---------------------------------------------|--------------------------|------------------|-----------------------|------------|-----------------------------------------------------------------------------|-----------------------------------------------------------------------------|
| 123                       | Lung cancer                                 | SNV MET c.3682G>C         | D1228H p.(Asp1228His)                       |                          | cDNA - NGS       | 46.21%                | 30.00      | 46.36%                                                                      | -                                                                           |
|                           |                                             | SNV MET c.3682G>T         | D1228Y p.(Asp1228Tyr)                       |                          | cDNA - NGS       | 3.13%                 |            | 3.18%                                                                       | -                                                                           |
|                           |                                             | SNV MET c.3688T>C         | Y1230H p.(Tyr1230His)                       |                          | cDNA - NGS       | 1.01%                 |            | 1.01%                                                                       | -                                                                           |
|                           |                                             | SNV MET c.3699A>G         | Y1230C p.(Tyr1230Cys)                       |                          | cDNA - NGS       | 0.04%                 |            | Not detected                                                                | VAF <0.1%                                                                   |
|                           |                                             | SNV MET c.3286G>T         | G1090C p.(Gly1090Cys)                       |                          | cDNA - NGS       | Not detected          |            | 3.42%                                                                       | -                                                                           |
| INDEL EGFR c.2240_2257del | L747_P753delinsS p.(Leu747_Pro753delinsSer) |                           | cDNA - NGS                                  | 61.92%                   |                  | 61.92%                | -          |                                                                             |                                                                             |
| 124                       | Lung cancer                                 | SNV TP53 c.372C>A         | C124* p.(Cys124*)                           |                          | cDNA - NGS       | 69.39%                |            | 70.10%                                                                      | -                                                                           |
|                           |                                             | SNV EGFR c.2573T>G        | L858R p.(Leu858Arg)                         |                          | cDNA - NGS       | 60.90%                |            | 61.47%                                                                      | -                                                                           |
|                           |                                             | SNV MET c.2923G>A         | E979K p.(Glu979Lys)                         |                          | cDNA - NGS       | Not detected          |            | 45.71%                                                                      | -                                                                           |
|                           |                                             | SNV ERBB2 c.976G>A        | D326N p.(Asp326Asn)                         |                          | cDNA - NGS       | Not detected          |            | 0.26%                                                                       | -                                                                           |
|                           |                                             | CNV ALK -                 | -                                           | Copy number gain         | cDNA - NGS       | Not covered           |            | GAIN - Fold change - 1.43                                                   | -                                                                           |
|                           |                                             | CNV ERBB2 -               | -                                           | Copy number gain         | cDNA - NGS       | Not detected          |            | GAIN - Fold change - 1.48                                                   | -                                                                           |
|                           |                                             | CNV MET -                 | -                                           | Copy number gain         | cDNA - NGS       | Not detected          |            | GAIN - Fold change - 1.84                                                   | -                                                                           |
|                           |                                             | CNV EGFR -                | -                                           | Copy number gain         | cDNA - NGS       | Not detected          |            | GAIN - Fold change - 2.28                                                   | -                                                                           |
|                           |                                             | SNV EGFR c.2573T>G        | L858R p.(Leu858Arg)                         |                          | cDNA - NGS       | 0.29%                 |            | 0.16%                                                                       | -                                                                           |
|                           |                                             | SNV TP53 c.747G>T         | R248S p.(Arg248Ser)                         |                          | cDNA - NGS       | 0.09%                 |            | Not detected                                                                | VAF <0.1%                                                                   |
| 125                       | Lung cancer                                 | SNV TP53 c.375G>T         | S33_1125del p.(Thr1125=)                    |                          | cDNA - NGS       | Not detected          |            | 0.46%                                                                       | -                                                                           |
|                           |                                             | SNV PTEN c.493G>A         | G165R p.(Gly165Arg)                         |                          | cDNA - NGS       | Not covered           |            | 13.78%                                                                      | -                                                                           |
|                           |                                             | SNV PTEN c.138C>G         | Y46* p.(Tyr46*)                             |                          | cDNA - NGS       | Not covered           |            | 16.72%                                                                      | -                                                                           |
|                           |                                             | SNV EGFR c.2218A>G        | T740V p.(Ile740Val)                         |                          | cDNA - NGS       | 0.03%                 |            | Not detected                                                                | VAF <0.1%                                                                   |
|                           |                                             | SNV KRAS c.181C>A         | G61V p.(Gln61Val)                           |                          | cDNA - NGS       | 13.95%                |            | 16.07%                                                                      | -                                                                           |
| 126                       | Lung cancer                                 | SNV TP53 c.843C>G         | D281E p.(Asp281Glu)                         |                          | cDNA - NGS       | 17.36%                |            | 18.36%                                                                      | -                                                                           |
|                           |                                             | SNV ERBB2 c.308G>T        | R103L p.(Arg103Leu)                         |                          | cDNA - NGS       | Not detected          |            | 0.17%                                                                       | -                                                                           |
|                           |                                             | SNV BRCA1 c.2185G>A       | E729K p.(Glu729Lys)                         |                          | cDNA - NGS       | 47%                   |            | Not covered                                                                 | -                                                                           |
|                           |                                             | SNV BRCA1 c.2185G>A       | E729K p.(Glu729Lys)                         |                          | cDNA - NGS       | 47%                   |            | Not covered                                                                 | -                                                                           |
|                           |                                             | SNV ALK -                 | -                                           | Copy number gain         | cDNA - NGS       | Not detected          |            | 0.17%                                                                       | -                                                                           |
| 127                       | Prostate cancer                             | SNV GNAS c.603G>A         | R201H p.(Arg201His)                         |                          | cDNA - NGS       | Not detected          |            | 0.44%                                                                       | -                                                                           |
|                           |                                             | SNV TP53 c.726C>G         | C242W p.(Cys242Trp)                         |                          | cDNA - NGS       | Not detected          |            | 0.20%                                                                       | -                                                                           |
|                           |                                             | INDEL BRAF c.1458_1472del | N486_T491delinsK p.(Asn486_Thr491delinsLys) |                          | cDNA - NGS       | Not detected          |            | 0.95%                                                                       | -                                                                           |
|                           |                                             | SNV EGFR c.442G>A         | V148M p.(Val148Met)                         |                          | cDNA - NGS       | 0.15%                 |            | Not detected                                                                | -                                                                           |
|                           |                                             | INDEL KRAS c.531_533del   | K180del p.(Lys180del)                       |                          | cDNA - NGS       | Not detected          |            | 44.61%                                                                      | -                                                                           |
| 128                       | Prostate cancer                             | CNV EGFR -                | -                                           | Copy number gain         | cDNA - NGS       | Not detected          |            | 44.61%                                                                      | -                                                                           |
|                           |                                             | CNV MET -                 | -                                           | Copy number gain         | cDNA - NGS       | Not detected          |            | GAIN - Fold change - 1.91                                                   | -                                                                           |
|                           |                                             | SNV TP53 c.527G>A         | C178Y p.(Cys178Tyr)                         |                          | cDNA - NGS       | Not detected          |            | GAIN - Fold change - 3.39                                                   | -                                                                           |
|                           |                                             | SNV MET c.50C>A           | T17N p.(Thr17Asn)                           |                          | cDNA - NGS       | Not detected          |            | 43.31%                                                                      | -                                                                           |
|                           |                                             | INDEL EGFR c.2240_2257del | L747_P753delinsS p.(Leu747_Pro753delinsSer) |                          | cDNA - NGS       | 54.32%                |            | 58.54%                                                                      | -                                                                           |
| 129                       | Prostate cancer                             | SNV EGFR c.2582T>A        | L861Q p.(Leu861Gln)                         |                          | cDNA - NGS       | 4.88%                 |            | 5.65%                                                                       | -                                                                           |
|                           |                                             | SNV BRAF G466V            |                                             |                          | cDNA - NGS       | 0.02%                 |            | Not detected                                                                | VAF <0.1%                                                                   |
|                           |                                             | SNV EGFR c.2389G>T        | T790M p.(Thr790Met)                         |                          | cDNA - NGS       | 1.90%                 |            | 1.90%                                                                       | -                                                                           |
|                           |                                             | CNV ERBB2 -               | -                                           | Copy number gain         | cDNA - NGS       | Not covered           |            | Score reported by orthogonal test is too low for confident reporting of CNV | -                                                                           |
|                           |                                             | SNV DPYD c.2846A>T        | D949V p.(Asp949Val)                         |                          | cDNA - NGS       | 0.11%                 |            | Not detected                                                                | -                                                                           |
| 130                       | Lung cancer                                 | INDEL EGFR c.2237_2254del | E746_S752delinsA p.(Glu746_Ser752delinsAla) |                          | cDNA - NGS       | 2.40%                 |            | 0.91%                                                                       | -                                                                           |
|                           |                                             | CNV EGFR1 -               | -                                           | Copy number gain         | cDNA - NGS       | Not covered           |            | GAIN - Fold change - 1.24                                                   | -                                                                           |
|                           |                                             | SNV TP53 c.375+5G>T       | X125_splice                                 |                          | cDNA - NGS       | Not covered           |            | 15.51%                                                                      | -                                                                           |
|                           |                                             | CNV EGFR -                | -                                           | Copy number gain         | cDNA - NGS       | Not covered           |            | 16.15%                                                                      | -                                                                           |
|                           |                                             | CNV MET -                 | -                                           | Copy number gain         | cDNA - NGS       | Not covered           |            | 15.51%                                                                      | -                                                                           |
| 131                       | Lung cancer                                 | Fusion EML4-ALK -         | -                                           | EML4:13:exon-ALK:20:exon | cDNA - NGS       | Not detected          |            | Supporting reads - 750 confidence score - 99                                | -                                                                           |
|                           |                                             | SNV TP53 c.574C>T         | Q192* p.(Gln192*)                           |                          | cDNA - NGS - CGP | Detected - VAF - 1.4% | 30.00      | 4.50%                                                                       | Supporting reads - 198 confidence score - 99                                |
|                           |                                             | Fusion EML4-ALK -         | -                                           | EML4:13:exon-ALK:20:exon | cDNA - NGS - CGP | Detected - VAF - 3.7% |            | 2.39%                                                                       | Supporting reads - 1103 confidence score - 99                               |
|                           |                                             | SNV TP53 c.853G>A         | E289K p.(Glu289Lys)                         |                          | cDNA - NGS - CGP | 12.10%                |            | 12.38%                                                                      | -                                                                           |
|                           |                                             | CNV EGFR -                | -                                           | Copy number gain         | cDNA - NGS - CGP | Fold change - 1.195   |            | Not detected                                                                | Score reported by orthogonal test is too low for confident reporting of CNV |
| 132                       | Lung cancer                                 | INDEL BRAF c.2128-5del    | X710_splice                                 |                          | cDNA - NGS - CGP | Not detected          |            | 1.56%                                                                       | -                                                                           |
|                           |                                             | Fusion EML4-ALK -         | -                                           | EML4:20:exon-ALK:20:exon | cDNA - NGS - CGP | Detected - VAF - 7.5% |            | Supporting reads - 1549 confidence score - 99                               | -                                                                           |
|                           |                                             | CNV EGFR -                | -                                           | Copy number gain         | cDNA - NGS - CGP | Fold change - 1.46    |            | GAIN - Fold change - 1.29                                                   | -                                                                           |
|                           |                                             | CNV PIK3CA -              | -                                           | Copy number loss         | cDNA - NGS - CGP | Not detected          |            | LOSS - Fold change - 0.79                                                   | -                                                                           |
|                           |                                             |                           |                                             |                          |                  |                       |            |                                                                             |                                                                             |

| Sample number | Sample type | Cancer type                         | MSI status determined by orthogonal method | Orthogonal MSI status determination method |
|---------------|-------------|-------------------------------------|--------------------------------------------|--------------------------------------------|
| 1             | FFPE        | CRC                                 | MSI -High                                  | Fragment analysis - Sanger seq - 5 markers |
| 2             | FFPE        | Lung                                | MSS                                        | N/A                                        |
| 3             | FFPE        | Lung                                | MSS                                        | N/A                                        |
| 4             | FFPE        | Lung                                | MSS                                        | N/A                                        |
| 5             | FFPE        | Metastatic adenocarcinoma           | MSS                                        | N/A                                        |
| 6             | FFPE        | CRC                                 | MSI-High                                   | Fragment analysis - Sanger seq - 5 markers |
| 7             | FFPE        | CRC                                 | MSI-High                                   | Fragment analysis - Sanger seq - 5 markers |
| 8             | FFPE        | N/A                                 | MSS                                        | Fragment analysis - Sanger seq - 5 markers |
| 9             | FFPE        | CRC                                 | MSI-High                                   | Fragment analysis - Sanger seq - 5 markers |
| 10            | gDNA        | CRC                                 | MSS                                        | Fragment analysis - Sanger seq - 5 markers |
| 11            | FFPE        | CA endometrium                      | MSI-High                                   | Fragment analysis - Sanger seq - 5 markers |
| 12            | gDNA        | CA endometrium                      | MSS                                        | Fragment analysis - Sanger seq - 5 markers |
| 13            | FFPE        | CA endometrium                      | MSI-High                                   | Fragment analysis - Sanger seq - 5 markers |
| 14            | gDNA        | CA endometrium                      | MSS                                        | Fragment analysis - Sanger seq - 5 markers |
| 15            | FFPE        | Spindle cell sarcoma                | MSS                                        | Fragment analysis - Sanger seq - 5 markers |
| 16            | FFPE        | CRC                                 | MSS                                        | Fragment analysis - Sanger seq - 5 markers |
| 17            | FFPE        | CRC                                 | MSI-High                                   | Fragment analysis - Sanger seq - 5 markers |
| 18            | gDNA        | CRC                                 | MSS                                        | Fragment analysis - Sanger seq - 5 markers |
| 19            | FFPE        | CA endometrium                      | MSS                                        | Fragment analysis - Sanger seq - 5 markers |
| 20            | FFPE        | Cholangiocarcinoma                  | MSS                                        | Fragment analysis - Sanger seq - 5 markers |
| 21            | FFPE        | Metastatic pulmonary adenocarcinoma | MSS                                        | N/A                                        |
| 22            | FFPE        | Lung                                | MSS                                        | N/A                                        |
| 23            | FFPE        | GIST                                | MSS                                        | N/A                                        |
| 24            | FFPE        | Lung                                | MSS                                        | N/A                                        |
| 25            | FFPE        | Breast                              | MSS                                        | N/A                                        |

| Gene_ID | SNV/Indel regio   | CNV | Fusions | Transcript - GRCh38 |
|---------|-------------------|-----|---------|---------------------|
| AKT1    | Ex 4              | -   | -       | NM_001382430.1      |
| ALK     | Full CDS          | Yes | Yes     | NM_004304.5         |
| BRAF    | Full CDS          | Yes | -       | NM_004333.6         |
| EGFR    | Full CDS + Part d | Yes | Yes     | NM_005228.5         |
| ERBB2   | Full CDS          | Yes | -       | NM_004448.4         |
| ESR1    | Ex 5-8            | -   | -       | NM_000125.4         |
| FGFR1   | Full CDS          | Yes | Yes     | NM_023110.3         |
| FGFR2   | Full CDS          | Yes | Yes     | NM_000141.5         |
| FGFR3   | Full CDS          | Yes | Yes     | NM_000142.5         |
| FGFR4   | Full CDS          | -   | -       | NM_213647.3         |
| GNA11   | Ex 4, 5           | -   | -       | NM_002067.5         |
| GNAQ    | Ex 4, 5           | -   | -       | NM_002072.5         |
| GNAS    | Ex 8, 9           | -   | -       | NM_000516.7         |
| HRAS    | Full CDS          | Yes | -       | NM_005343.4         |
| IDH1    | Ex 4              | -   | -       | NM_005896.4         |
| IDH2    | Ex 4              | -   | -       | NM_002168.4         |
| KEAP1   | Full CDS          | -   | -       | NM_203500.2         |
| KIT     | Full CDS          | -   | -       | NM_000222.3         |
| KRAS    | Full CDS          | Yes | -       | NM_004985.5         |
| MAP2K1  | Ex 2-6, 8         | -   | -       | NM_002755.4         |
| MET     | Full CDS          | Yes | Yes     | NM_000245.4         |
| NRAS    | Full CDS          | Yes | -       | NM_002524.5         |
| NTRK1   | Ex 13-17          | -   | Yes     | NM_002529.4         |
| NTRK2   | Ex 14-19          | -   | -       | NM_006180.6         |
| NTRK3   | Ex 15-20          | -   | -       | NM_001012338.3      |
| PDGFRA  | Ex 12, 18         | -   | -       | NM_006206.6         |
| PIK3CA  | Full CDS          | Yes | -       | NM_006218.4         |
| PTEN    | Full CDS          | -   | -       | NM_000314.8         |
| RET     | Full CDS          | Yes | Yes     | NM_020975.6         |
| ROS1    | Ex 36-41          | -   | Yes     | NM_001378902.1      |
| STK11   | Full CDS          | -   | -       | NM_000455.5         |
| TP53    | Full CDS          | Yes | -       | NM_000546.6         |



|                                                                                                         | <b>NextSeq 500/550</b> | <b>NextSeq 1000/2000</b> | <b>NovaSeq 6000</b> | <b>All</b>     |
|---------------------------------------------------------------------------------------------------------|------------------------|--------------------------|---------------------|----------------|
| <b>Flow Cell</b>                                                                                        | Mid-output             | P1/P2                    | SP                  |                |
| <b>N runs</b>                                                                                           | 10                     | 7                        | 4                   | 21             |
| <b>N samples</b>                                                                                        | 55                     | 50                       | 55                  | 160            |
| <b>Reads [M]</b>                                                                                        | 44.33±9.11             | 59.28±10.46              | 61.03±12.51         | 54.74±13.19    |
| <b>Bases [Gb]</b>                                                                                       | 6.60±1.36              | 8.95±1.58                | 9.70±1.99           | 8.40±2.14      |
| <b>Aligned duplex consensus reads [M]</b>                                                               | 1.06±0.26              | 1.22±0.17                | 1.29±0.29           | 1.19±0.27      |
| <b>Duplex consensus reads aligned on target [%]</b>                                                     | 95.94±1.73             | 94.94±1.72               | 97.22±2.04          | 96.08±2.06     |
| <b>Mean coverage (duplex consensus reads) - from Prime [x]</b>                                          | 758.67±187.69          | 871.28±134.08            | 944.29±229.54       | 857.67±204.56  |
| <b>Mean coverage on target (duplex consensus reads) [x]</b>                                             | 768.49±190.28          | 883.13±136.81            | 959.09±234.42       | 869.83±208.59  |
| <b>Mean coverage on exons relevant for NSCLC ESCAT Level 1 SNVs/Indels (duplex consensus reads) [x]</b> | 957.74±243.11          | 1012.01±156.54           | 1119.43±280.00      | 1030.28±244.07 |
| <b>Fraction of target covered (duplex consensus reads) [%]</b>                                          | 100.00±0.01            | 100.00±0.00              | 100.00±0.00         | 100.00±0.00    |
| <b>Coverage evenness [%]</b>                                                                            | 81.96±4.04             | 86.12±3.48               | 83.03±4.28          | 83.63±4.32     |

|                                                                | <b>NextSeq 500/550</b> | <b>NextSeq 2000</b> | <b>NovaSeq 6000</b> | <b>All</b>    |
|----------------------------------------------------------------|------------------------|---------------------|---------------------|---------------|
| <b>Flow Cell</b>                                               | Mid-output             | P2                  | SP                  |               |
| <b>N runs</b>                                                  | 4                      | 5                   | 2                   | 11            |
| <b>N samples</b>                                               | 14                     | 11                  | 12                  | 37            |
| <b>Reads [M]</b>                                               | 44.53±2.02             | 70.41±11.32         | 60.23±4.94          | 58.20±12.86   |
| <b>Bases [Gb]</b>                                              | 6.63±0.30              | 10.63±1.71          | 9.58±0.79           | 8.92±2.02     |
| <b>Aligned duplex consensus reads [M]</b>                      | 1.23±0.17              | 1.49±0.10           | 1.34±0.25           | 1.35±0.21     |
| <b>Duplex consensus reads aligned on target [%]</b>            | 96.32±1.21             | 97.59±0.11          | 99.39±0.38          | 97.76±1.49    |
| <b>Mean coverage (duplex consensus reads) - from Prime [x]</b> | 891.61±120.73          | 1094.67±72.32       | 987.67±178.85       | 989.88±155.51 |
| <b>Fraction of target covered (duplex consensus reads) [%]</b> | 100.00±0.01            | 100.00±0.00         | 100.00±0.00         | 100.00±0.01   |
| <b>Coverage evenness [%]</b>                                   | 79.77±2.10             | 80.72±1.46          | 79.23±1.98          | 79.90±1.97    |

| <b>Sample type</b>                          | <b>Region</b>                      | <b>Mean coverage<br/>(duplex consensus<br/>reads) [x]</b> |
|---------------------------------------------|------------------------------------|-----------------------------------------------------------|
| <b>Clinical cfDNA (N=14)</b>                | <b>ESCAT Level 1 for<br/>NSCLC</b> | 1093±153                                                  |
|                                             | <b>Other target regions</b>        | 794±111                                                   |
|                                             | <b>All target regions</b>          | 896±118                                                   |
| <b>cfDNA reference standards<br/>(N=23)</b> | <b>ESCAT Level 1 for<br/>NSCLC</b> | 1206±161                                                  |
|                                             | <b>Other target regions</b>        | 953±135                                                   |
|                                             | <b>All target regions</b>          | 1050±145                                                  |

|                                                                    | <b>NextSeq 2000</b> |
|--------------------------------------------------------------------|---------------------|
| <b>Flow Cell</b>                                                   | P2                  |
| <b>N runs</b>                                                      | 4                   |
| <b>N samples</b>                                                   | 36                  |
| <b>Reads [M]</b>                                                   | 60.68±11.25         |
| <b>Bases [Gb]</b>                                                  | 9.16±1.70           |
| <b>Aligned duplex consensus reads [M]</b>                          | 1.27±0.17           |
| <b>Duplex consensus reads aligned on target [%]</b>                | 95.14±1.56          |
| <b>Mean coverage (duplex consensus reads) -<br/>from Prime [x]</b> | 899.34±136.38       |
| <b>Fraction of target covered (duplex consensus<br/>reads) [%]</b> | 100.00±0.00         |
| <b>Coverage evenness [%]</b>                                       | 85.99±3.07          |

| Alteration                                                                     | Alteration details                                                                                                                                                           | Alteration type | Relevance for tumor type | Number positives / Number expected | Analytical sensitivity | Observed VAF (median and range)* | Supporting reads depth (median and range)* |
|--------------------------------------------------------------------------------|------------------------------------------------------------------------------------------------------------------------------------------------------------------------------|-----------------|--------------------------|------------------------------------|------------------------|----------------------------------|--------------------------------------------|
| <b>ALK SNVs (Acquired resistance kinase domain mutations) (N=5)</b>            | 2:29416326:G:A (P1543S), 2:29432664:C:T (R1275Q), 2:29436893:C:T, 2:29443695:G:T (F1174L), 2:29445450:C:G (G1128A)                                                           | SNVs            | NSCLC                    | 50/50                              | 100.00%                | 0.26% (0.12-0.67%)               | 6 (3-16)                                   |
| <b>BRAF V600E</b>                                                              | 7:140453136:A:T (V600E)                                                                                                                                                      | SNVs            | NSCLC, CRC, Melanoma     | 16/16                              | 100.00%                | 0.57% (0.12-0.97%)               | 13 (2-23)                                  |
| <b>EGFR Ex 19 Deletions (N=2)</b>                                              | 7:55242464:AGGAATTAAGAGAAGC:A (E746_A750del), 7:55242465:GGAATTAAGAGAAGCA:G (E746_A750del)                                                                                   | Indels          | NSCLC                    | 23/23                              | 100.00%                | 0.49% (0.14-0.80%)               | 10 (4-22)                                  |
| <b>EGFR Exon 20 insertions</b>                                                 | 7:55248998:A:ATGCCAGCG (V769_D770insASV)                                                                                                                                     | Indels          | NSCLC                    | 12/13                              | 92.31%                 | 0.31% (0.13-0.72%)               | 4 (2-10)                                   |
| <b>EGFR L858R</b>                                                              | 7:55259515:T:G (L858R)                                                                                                                                                       | SNVs            | NSCLC                    | 19/19                              | 100.00%                | 0.38% (0.13-0.80%)               | 10 (4-15)                                  |
| <b>EGFR T790M</b>                                                              | 7:55249071:C:T (T790M)                                                                                                                                                       | SNVs            | NSCLC                    | 19/19                              | 100.00%                | 0.35% (0.11-0.59%)               | 7 (2-11)                                   |
| <b>ESR1 D538G</b>                                                              | 6:152419926:A:G (D538G)                                                                                                                                                      | SNVs            | Breast                   | 10/10                              | 100.00%                | 0.27% (0.13-0.46%)               | 6 (3-11)                                   |
| <b>IDH1 R132C</b>                                                              | 2:209113113:G:A (R132C)                                                                                                                                                      | SNVs            | CHOL                     | 10/10                              | 100.00%                | 0.40% (0.12-0.77%)               | 7 (2-12)                                   |
| <b>KIT D816V</b>                                                               | 4:55599321:A:T (D816V)                                                                                                                                                       | SNVs            | GIST                     | 8/10                               | 80.00%                 | 0.46% (0.24-0.69%)               | 9 (4-13)                                   |
| <b>KIT SNVs (N=8)</b>                                                          | 4:55565852:G:T, 4:55569926:G:A, 4:55573299:A:G, 4:55575593:C:T, 4:55593661:T:C (L576P), 4:55594221:A:G (K642E), 4:55602765:G:A, 4:55603391:C:A                               | SNVs            | GIST                     | 50/50                              | 100.00%                | 0.44% (0.14-0.88%)               | 7 (2-19)                                   |
| <b>KIT SNVs (N=8)</b>                                                          | 4:55565852:G:T, 4:55569926:G:A, 4:55573299:A:G, 4:55575593:C:T, 4:55593661:T:C (L576P), 4:55594221:A:G (K642E), 4:55602765:G:A, 4:55603391:C:A                               | SNVs            | GIST                     | 28/30                              | 93.33%                 | 0.28% (0.12-0.58%)               | 8 (3-19)                                   |
| <b>KIT insertions/deletions (N=9)</b>                                          | 4:55524240:TC:T, 4:55561938:TTTG:T, 4:55564681:AG:A, 4:55589771:A:ACGATTTT, 4:55592178:C:CTGCCTT, 4:55595617:TATAAGA:T, 4:55597490:CCAG:C, 4:55598133:CA:C, 4:55604631:CAG:C | Indels          | GIST                     | 20/20                              | 100.00%                | 0.39% (0.24-0.68%)               | 6 (4-16)                                   |
| <b>KIT insertions/deletions (N=9)</b>                                          | 4:55524240:TC:T, 4:55561938:TTTG:T, 4:55564681:AG:A, 4:55589771:A:ACGATTTT, 4:55592178:C:CTGCCTT, 4:55595617:TATAAGA:T, 4:55597490:CCAG:C, 4:55598133:CA:C, 4:55604631:CAG:C | Indels          | GIST                     | 64/70                              | 91.43%                 | 0.39% (0.11-1.28%)               | 6 (2-13)                                   |
| <b>KRAS G12C/D/V</b>                                                           | 12:25398284:C:T (G12D)                                                                                                                                                       | SNVs            | NSCLC, CRC               | 15/15                              | 100.00%                | 0.58% (0.30-1.23%)               | 10 (5-22)                                  |
| <b>KRAS G13D</b>                                                               | 12:25398281:C:T (G13D)                                                                                                                                                       | SNVs            | NSCLC, CRC               | 10/10                              | 100.00%                | 0.27% (0.23-0.61%)               | 5 (4-11)                                   |
| <b>KRAS K117N</b>                                                              | 12:25378647:T:G (K117N)                                                                                                                                                      | SNVs            | NSCLC, CRC               | 10/10                              | 100.00%                | 0.48% (0.33-0.64%)               | 9 (6-11)                                   |
| <b>KRAS Q61K/H (N=2)</b>                                                       | 12:25380275:T:G (Q61H), 12:25380277:G:T (Q61K)                                                                                                                               | SNVs            | NSCLC, CRC               | 16/16                              | 100.00%                | 0.34% (0.13-0.77%)               | 6 (2-10)                                   |
| <b>MET D1246N</b>                                                              | 7:116423407:G:A (d1246n)                                                                                                                                                     | SNVs            | NSCLC                    | 10/10                              | 100.00%                | 0.44% (0.16-0.82%)               | 8 (3-17)                                   |
| <b>MET Exon 14 Skipping</b>                                                    | 7:116412044:G:A (exon_14_skip)                                                                                                                                               | SNVs            | NSCLC                    | 10/10                              | 100.00%                | 0.48% (0.35-0.80%)               | 9 (6-14)                                   |
| <b>PDGFRA D842V</b>                                                            | 4:55152093:A:T (D842V)                                                                                                                                                       | SNVs            | GIST                     | 10/10                              | 100.00%                | 0.31% (0.22-0.79%)               | 6 (4-12)                                   |
| <b>PIK3CA E545K</b>                                                            | 3:178936091:G:A (E545K)                                                                                                                                                      | SNVs            | Breast                   | 27/29                              | 93.10%                 | 0.46% (0.12-0.73%)               | 8 (2-14)                                   |
| <b>PIK3CA H1047R</b>                                                           | 3:178952085:A:G (H1047R)                                                                                                                                                     | SNVs            | Breast                   | 16/16                              | 100.00%                | 0.41% (0.13-1.95%)               | 7 (2-28)                                   |
| <b>RET SNVs (N=2)</b>                                                          | 10:43613843:G:A, 10:43617416:T:C (M918T)                                                                                                                                     | SNVs            | Thyroid, NSCLC           | 19/20                              | 95.00%                 | 0.35% (0.18-0.58%)               | 8 (4-14)                                   |
| <b>RET insertions/deletions (N=2)</b>                                          | 10:43609073:ACTGCTCCCTGAGGAGGAGAAGTGCTT:A, 10:43615611:GAGATGTTATGA:G                                                                                                        | Indels          | Thyroid, NSCLC           | 16/20                              | 80.00%                 | 0.29% (0.15-0.73%)               | 6 (2-10)                                   |
| <b>ROS1 SNVs (Acquired resistance kinase domain mutations) (N=2)</b>           | 6:117638347:C:T (G2032R), 6:117639351:C:T                                                                                                                                    | SNVs            | NSCLC                    | 20/20                              | 100.00%                | 0.29% (0.16-0.78%)               | 7 (4-16)                                   |
| <b>ROS1 insertions/deletions (Acquired resistance kinase domain mutations)</b> | 6:117641138:G:GA                                                                                                                                                             | Indels          | NSCLC                    | 9/10                               | 90.00%                 | 0.55% (0.24-0.67%)               | 12 (6-17)                                  |
| <b>CCDC6-RET</b>                                                               | CCDC6 exon 1   RET exon 11                                                                                                                                                   | Fusions         | N/A                      | 8/8                                | 100.00%                | 0.30% (0.06-1.29%)               | 80 (20-170)                                |
| <b>CD74-ROS1</b>                                                               | CD74 exon 6   ROS1 exon 35                                                                                                                                                   | Fusions         | N/A                      | 10/10                              | 100.00%                | 1.08% (0.44-1.98%)               | 43 (18-60)                                 |
| <b>EML4-ALK</b>                                                                | EML4 exon 13   ALK exon 20                                                                                                                                                   | Fusions         | N/A                      | 10/10                              | 100.00%                | 0.16% (0.13-0.42%)               | 39 (31-64)                                 |
| <b>NCOA4-RET</b>                                                               | NCOA4 exon 7   RET exon 12                                                                                                                                                   | Fusions         | N/A                      | 18/18                              | 100.00%                | 0.26% (0.13-0.67%)               | 40 (24-62)                                 |
| <b>TPR-ALK</b>                                                                 | TPR exon 15   ALK exon 20                                                                                                                                                    | Fusions         | N/A                      | 8/8                                | 100.00%                | 0.25% (0.13-0.40%)               | 46 (32-64)                                 |

|    | Alteration type | Gene    | Variant          | Variant ESCAT description | RecordID                                   | REF                          | ALT        | Relevant tumor type | Reference standard                              | Spike-in frequency | TP | FP | FN | TN    | N variants total | Analytical sensitivity | Observed allele frequency (median and range) | Observed supporting reads (median and range) | All variants | ESCAT Level 1 (all tumor types) | ESCAT Level 1 NSCLC |
|----|-----------------|---------|------------------|---------------------------|--------------------------------------------|------------------------------|------------|---------------------|-------------------------------------------------|--------------------|----|----|----|-------|------------------|------------------------|----------------------------------------------|----------------------------------------------|--------------|---------------------------------|---------------------|
| 0  | Indels          | ALK     |                  |                           | 229456452:ACA                              | AC                           | A          |                     | Twist cDNA Pan Cancer                           | 0.005              | 10 | 0  | 0  | 80499 | 10               | 100                    | 0.58% (0.14-0.77%)                           | 12 (3-18)                                    | 1            | 0                               | 0                   |
| 1  | Indels          | ALK     |                  |                           | 22949832:TC:T                              | TC                           | T          |                     | Twist cDNA Pan Cancer                           | 0.005              | 10 | 0  | 0  | 80499 | 10               | 100                    | 0.34% (0.15-0.93%)                           | 6 (3-14)                                     | 1            | 0                               | 0                   |
| 2  | Indels          | ALK     |                  |                           | 229541121:GTG                              | GT                           | T          |                     | Twist cDNA Pan Cancer                           | 0.005              | 10 | 0  | 0  | 80499 | 10               | 100                    | 0.36% (0.20-1.04%)                           | 7 (4-21)                                     | 1            | 0                               | 0                   |
| 3  | Indels          | ALK     |                  |                           | 229543663:T:TA                             | T                            | TA         |                     | Twist cDNA Pan Cancer                           | 0.005              | 8  | 0  | 2  | 80499 | 10               | 80                     | 0.34% (0.10-0.44%)                           | 7 (2-9)                                      | 1            | 0                               | 0                   |
| 4  | Indels          | EGFR    |                  |                           | 7.55271796.CCCGCGAGG.C                     | CCCGCGAGG                    | C          |                     | Twist cDNA Pan Cancer                           | 0.005              | 10 | 0  | 0  | 80499 | 10               | 100                    | 0.39% (0.27-0.55%)                           | 13 (9-18)                                    | 1            | 0                               | 0                   |
| 5  | Indels          | EGFR    |                  |                           | 7.55223031:GTG:T                           | GTG                          | T          |                     | Twist cDNA Pan Cancer                           | 0.005              | 9  | 0  | 1  | 80499 | 10               | 90                     | 0.39% (0.25-0.54%)                           | 9 (6-10)                                     | 1            | 0                               | 0                   |
| 6  | Indels          | EGFR    |                  |                           | 7.55229231:AGA                             | AG                           | A          |                     | Twist cDNA Pan Cancer                           | 0.005              | 9  | 0  | 1  | 80499 | 10               | 90                     | 0.37% (0.11-0.83%)                           | 6 (2-10)                                     | 1            | 0                               | 0                   |
| 7  | Indels          | EGFR    |                  |                           | 7.55233067:GTG:T                           | GT                           | T          |                     | Twist cDNA Pan Cancer                           | 0.005              | 9  | 0  | 1  | 80499 | 10               | 90                     | 0.46% (0.14-0.49%)                           | 10 (3-11)                                    | 1            | 0                               | 0                   |
| 8  | Indels          | EGFR    |                  |                           | 7.55240741:GTG:T                           | GT                           | T          |                     | Twist cDNA Pan Cancer                           | 0.005              | 9  | 0  | 1  | 80499 | 10               | 90                     | 0.42% (0.16-0.46%)                           | 8 (3-10)                                     | 1            | 0                               | 0                   |
| 9  | Indels          | EGFR    | E746_A750del     | EGFR Ex 19 Deletions      | 7.55242464:AGGAATAAGAGAAC                  | AGGAATAAGAGAAC               | A          | NSCLC               | Horizon Multiplex cDNA                          | 0.005              | 9  | 0  | 0  | 80500 | 9                | 100                    | 0.54% (0.21-0.80%)                           | 10 (4-14)                                    | 1            | 1                               | 1                   |
| 10 | Indels          | EGFR    | E746_A750del     | EGFR Ex 19 Deletions      | 7.55242464:AGGAATAAGAGAAC                  | AGGAATAAGAGAAC               | A          | NSCLC               | Horizon Structural Multiplex Reference Standard | 0.005              | 4  | 0  | 0  | 80505 | 4                | 100                    | 0.38% (0.23-0.63%)                           | 7 (4-12)                                     | 1            | 1                               | 1                   |
| 11 | Indels          | EGFR    | E746_A750del     | EGFR Ex 19 Deletions      | 7.55242465:GGAATTAAGAGAAC                  | GGAATTAAGAGAAC               | G          | NSCLC               | Twist cDNA Pan Cancer                           | 0.005              | 10 | 0  | 0  | 80499 | 10               | 100                    | 0.38% (0.14-0.64%)                           | 13 (4-22)                                    | 1            | 1                               | 1                   |
| 12 | Indels          | EGFR    | V769_D770nsASV   | EGFR Exon 20 insertions   | 7.55248998.AATGGCCAGCG                     | A                            | ATGGCCAGCG | NSCLC               | Horizon Multiplex cDNA                          | 0.005              | 9  | 0  | 0  | 80500 | 9                | 100                    | 0.28% (0.13-0.72%)                           | 4 (2-10)                                     | 1            | 1                               | 1                   |
| 13 | Indels          | EGFR    | V769_D770nsASV   | EGFR Exon 20 insertions   | 7.55248998.AATGGCCAGCG                     | A                            | ATGGCCAGCG | NSCLC               | Horizon Structural Multiplex Reference Standard | 0.005              | 3  | 0  | 1  | 80505 | 4                | 75                     | 0.54% (0.28-0.62%)                           | 8 (4-9)                                      | 1            | 1                               | 1                   |
| 14 | Indels          | ERBB2   |                  |                           | 17.37883033:GTGCTCCGCGACCTTACAG:T          | GTGCTCCGCGACCTTACAG          | T          |                     | Twist cDNA Pan Cancer                           | 0.005              | 2  | 0  | 8  | 80499 | 10               | 20                     | 0.18% (0.18-0.18%)                           | 3 (3-3)                                      | 1            | 0                               | 0                   |
| 15 | Indels          | ERBB2   |                  |                           | 17.3786636:G:G                             | G                            | G          |                     | Twist cDNA Pan Cancer                           | 0.005              | 9  | 0  | 1  | 80499 | 10               | 90                     | 0.29% (0.17-0.55%)                           | 6 (4-10)                                     | 1            | 0                               | 0                   |
| 16 | Indels          | ERBB2   |                  |                           | 17.3786636:G:G                             | G                            | G          |                     | Twist cDNA Pan Cancer                           | 0.005              | 10 | 0  | 0  | 80499 | 10               | 100                    | 0.19% (0.13-0.27%)                           | 3 (2-4)                                      | 1            | 0                               | 0                   |
| 17 | Indels          | ERBB2   |                  |                           | 17.3786654:CAAG:C                          | CAAG                         | C          |                     | Twist cDNA Pan Cancer                           | 0.005              | 10 | 0  | 0  | 80499 | 10               | 100                    | 0.34% (0.18-0.49%)                           | 6 (4-11)                                     | 1            | 0                               | 0                   |
| 18 | Indels          | ERBB2   |                  |                           | 17.37872131:GCT:G                          | GCT                          | G          |                     | Twist cDNA Pan Cancer                           | 0.005              | 9  | 0  | 1  | 80499 | 10               | 90                     | 0.24% (0.12-0.55%)                           | 4 (2-8)                                      | 1            | 0                               | 0                   |
| 19 | Indels          | ERBB2   |                  |                           | 17.37873887:GATGAGGAGGGCGCATGACAGC         | GATGAGGAGGGCGCATGACAGC       | G          |                     | Twist cDNA Pan Cancer                           | 0.005              | 7  | 0  | 3  | 80499 | 10               | 70                     | 0.25% (0.15-0.66%)                           | 3 (2-6)                                      | 1            | 0                               | 0                   |
| 20 | Indels          | ERBB2   |                  |                           | 17.37876051:GTG:T                          | GT                           | T          |                     | Twist cDNA Pan Cancer                           | 0.005              | 9  | 0  | 1  | 80499 | 10               | 90                     | 0.41% (0.20-0.90%)                           | 10 (5-22)                                    | 1            | 0                               | 0                   |
| 21 | Indels          | ERBB2   |                  |                           | 17.37879795:TTGAT:T                        | TTGAT                        | T          |                     | Twist cDNA Pan Cancer                           | 0.005              | 10 | 0  | 0  | 80499 | 10               | 100                    | 0.39% (0.15-0.53%)                           | 10 (2-22)                                    | 1            | 0                               | 0                   |
| 22 | Indels          | ERBB2   |                  |                           | 17.37882864:GCT:G                          | GCT                          | G          |                     | Twist cDNA Pan Cancer                           | 0.005              | 10 | 0  | 0  | 80499 | 10               | 100                    | 0.39% (0.15-0.64%)                           | 9 (6-10)                                     | 1            | 0                               | 0                   |
| 23 | Indels          | ERBB2   |                  |                           | 17.37882864:GCT:G                          | GCT                          | G          |                     | Twist cDNA Pan Cancer                           | 0.005              | 10 | 0  | 0  | 80499 | 10               | 100                    | 0.37% (0.28-0.83%)                           | 7 (5-18)                                     | 1            | 0                               | 0                   |
| 24 | Indels          | ERBB2   |                  |                           | 17.37883605:TTCTCACTGGCCCTCCGAAAGGGCTCTG:T | TTCTCACTGGCCCTCCGAAAGGGCTCTG | T          |                     | Twist cDNA Pan Cancer                           | 0.005              | 5  | 0  | 5  | 80499 | 10               | 50                     | 0.43% (0.23-0.62%)                           | 6 (3-7)                                      | 1            | 0                               | 0                   |
| 25 | Indels          | ERBB2   |                  |                           | 17.37884126:C:CAAG                         | C                            | CAAG       |                     | Twist cDNA Pan Cancer                           | 0.005              | 7  | 0  | 3  | 80499 | 10               | 70                     | 0.31% (0.21-0.57%)                           | 8 (5-13)                                     | 1            | 0                               | 0                   |
| 26 | Indels          | ERBB2   | Y772_A775dup     |                           | 17.3788081A:AGCATAGTGATG                   | AGCATAGTGATG                 | A          | AGCATAGTGATG        | Sens ID 5 plex Positive Control                 | 0.005              | 6  | 0  | 0  | 80503 | 6                | 100                    | 0.77% (0.59-1.15%)                           | 16 (13-25)                                   | 1            | 0                               | 0                   |
| 27 | Indels          | ERBB2   | Y772_A775dup     |                           | 17.3788081A:AGCATAGTGATG                   | AGCATAGTGATG                 | A          | AGCATAGTGATG        | Twist cDNA Pan Cancer                           | 0.005              | 10 | 0  | 0  | 80499 | 10               | 100                    | 0.24% (0.12-0.42%)                           | 8 (4-13)                                     | 1            | 0                               | 0                   |
| 28 | Indels          | FGFR3   |                  |                           | 4.1801137:GTG:T                            | GT                           | T          |                     | Twist cDNA Pan Cancer                           | 0.005              | 10 | 0  | 0  | 80499 | 10               | 100                    | 0.31% (0.23-1.02%)                           | 6 (4-14)                                     | 1            | 0                               | 0                   |
| 29 | Indels          | FGFR3   |                  |                           | 4.1805481:TAGGAGAGC:T                      | TAGGAGAGC                    | T          |                     | Twist cDNA Pan Cancer                           | 0.005              | 10 | 0  | 0  | 80499 | 10               | 100                    | 0.48% (0.15-0.98%)                           | 7 (2-11)                                     | 1            | 0                               | 0                   |
| 30 | Indels          | FGFR3   |                  |                           | 4.1806550:G:GGTACCA                        | G                            | GGTACCA    |                     | Twist cDNA Pan Cancer                           | 0.005              | 9  | 0  | 1  | 80499 | 10               | 90                     | 0.30% (0.20-0.78%)                           | 4 (2-11)                                     | 1            | 0                               | 0                   |
| 31 | Indels          | FGFR3   |                  |                           | 4.1808948:C:CGA                            | C                            | CGA        |                     | Twist cDNA Pan Cancer                           | 0.005              | 5  | 0  | 5  | 80499 | 10               | 50                     | 0.20% (0.20-0.70%)                           | 2 (2-7)                                      | 1            | 0                               | 0                   |
| 32 | Indels          | FGFR3   |                  |                           | 4.1808948:C:CGA                            | C                            | CGA        |                     | Twist cDNA Pan Cancer                           | 0.005              | 9  | 0  | 1  | 80499 | 10               | 90                     | 0.29% (0.25-0.39%)                           | 7 (6-10)                                     | 1            | 0                               | 0                   |
| 33 | Indels          | GN11    |                  |                           | 19.3114887:CAAC                            | CA                           | C          |                     | Twist cDNA Pan Cancer                           | 0.005              | 10 | 0  | 0  | 80499 | 10               | 100                    | 0.23% (0.11-0.27%)                           | 4 (2-5)                                      | 1            | 0                               | 0                   |
| 34 | Indels          | GN11    |                  |                           | 19.3118333:GTG:T                           | GT                           | T          |                     | Twist cDNA Pan Cancer                           | 0.005              | 10 | 0  | 0  | 80499 | 10               | 100                    | 0.39% (0.25-0.53%)                           | 7 (5-11)                                     | 1            | 0                               | 0                   |
| 35 | Indels          | KIT     |                  | KIT insertions/deletions  | 4.5552420:TC:T                             | TC                           | T          | GIST                | Twist cDNA Pan Cancer                           | 0.005              | 9  | 0  | 1  | 80499 | 10               | 90                     | 0.53% (0.28-1.28%)                           | 5 (2-11)                                     | 1            | 0                               | 0                   |
| 36 | Indels          | KIT     |                  | KIT insertions/deletions  | 4.5556193:TTG:T                            | TTG                          | T          | GIST                | Twist cDNA Pan Cancer                           | 0.005              | 10 | 0  | 0  | 80499 | 10               | 100                    | 0.21% (0.14-0.97%)                           | 3 (2-12)                                     | 1            | 0                               | 0                   |
| 37 | Indels          | KIT     |                  | KIT insertions/deletions  | 4.55564681:AGA:A                           | AGA                          | A          | GIST                | Twist cDNA Pan Cancer                           | 0.005              | 9  | 0  | 1  | 80499 | 10               | 90                     | 0.17% (0.12-0.71%)                           | 3 (2-13)                                     | 1            | 0                               | 0                   |
| 38 | Indels          | KIT     |                  | KIT insertions/deletions  | 4.55589771:A:ACGATTTT                      | A                            | ACGATTTT   | GIST                | Twist cDNA Pan Cancer                           | 0.005              | 10 | 0  | 0  | 80499 | 10               | 100                    | 0.39% (0.25-0.57%)                           | 6 (4-9)                                      | 1            | 1                               | 0                   |
| 39 | Indels          | KIT     |                  | KIT insertions/deletions  | 4.5559978:C:CTGCGTT                        | C                            | CTGCGTT    | GIST                | Twist cDNA Pan Cancer                           | 0.005              | 10 | 0  | 0  | 80499 | 10               | 100                    | 0.39% (0.24-0.88%)                           | 8 (5-16)                                     | 1            | 1                               | 0                   |
| 40 | Indels          | KIT     |                  | KIT insertions/deletions  | 4.5559517:TAGAGATC                         | T                            | TAGAGATC   | GIST                | Twist cDNA Pan Cancer                           | 0.005              | 9  | 0  | 1  | 80499 | 10               | 90                     | 0.60% (0.34-0.91%)                           | 8 (4-10)                                     | 1            | 0                               | 0                   |
| 41 | Indels          | KIT     |                  | KIT insertions/deletions  | 4.55597490:CCAG:C                          | CCAG                         | C          | GIST                | Twist cDNA Pan Cancer                           | 0.005              | 10 | 0  | 0  | 80499 | 10               | 100                    | 0.44% (0.13-0.72%)                           | 8 (2-9)                                      | 1            | 0                               | 0                   |
| 42 | Indels          | KIT     |                  | KIT insertions/deletions  | 4.55598133:CA:C                            | CA                           | C          | GIST                | Twist cDNA Pan Cancer                           | 0.005              | 9  | 0  | 1  | 80499 | 10               | 90                     | 0.56% (0.18-0.83%)                           | 6 (2-9)                                      | 1            | 0                               | 0                   |
| 43 | Indels          | KIT     |                  | KIT insertions/deletions  | 4.5560431:CAAG:C                           | CAAG                         | C          | GIST                | Twist cDNA Pan Cancer                           | 0.005              | 8  | 0  | 2  | 80499 | 10               | 80                     | 0.31% (0.11-0.45%)                           | 7 (2-10)                                     | 1            | 0                               | 0                   |
| 44 | Indels          | MET     |                  |                           | 7.116339746:CTCT:C                         | CTCT                         | C          |                     | Twist cDNA Pan Cancer                           | 0.005              | 9  | 0  | 1  | 80499 | 10               | 90                     | 0.27% (0.12-0.47%)                           | 4 (2-8)                                      | 1            | 0                               | 0                   |
| 45 | Indels          | MET     |                  |                           | 7.11633943:ATTTCAGTCTGG                    | ATTTCAGTCTGG                 | A          |                     | Twist cDNA Pan Cancer                           | 0.005              | 10 | 0  | 0  | 80499 | 10               | 100                    | 0.38% (0.23-0.67%)                           | 6 (4-12)                                     | 1            | 0                               | 0                   |
| 46 | Indels          | MET     |                  |                           | 7.116395509:CTAGAGTCTCTCTGGAAATGAG         | CTAGAGTCTCTCTGGAAATGAG       | A          |                     | Twist cDNA Pan Cancer                           | 0.005              | 10 | 0  | 0  | 80499 | 10               | 100                    | 0.48% (0.28-0.65%)                           | 8 (4-12)                                     | 1            | 0                               | 0                   |
| 47 | Indels          | MET     |                  |                           | 7.116398541:ACA:AC                         | AC                           | A          | AT                  | Twist cDNA Pan Cancer                           | 0.005              | 10 | 0  | 0  | 80499 | 10               | 100                    | 0.42% (0.27-0.83%)                           | 7 (4-15)                                     | 1            | 0                               | 0                   |
| 48 | Indels          | MET     |                  |                           | 7.116399448:GTG:T                          | GT                           | T          |                     | Twist cDNA Pan Cancer                           | 0.005              | 9  | 0  | 1  | 80499 | 10               | 90                     | 0.19% (0.12-0.58%)                           | 4 (3-11)                                     | 1            | 0                               | 0                   |
| 49 | Indels          | MET     |                  |                           | 7.116403181:C:CA                           | C                            | CA         |                     | Twist cDNA Pan Cancer                           | 0.005              | 10 | 0  | 0  | 80499 | 10               | 100                    | 0.18% (0.14-0.29%)                           | 4 (3-7)                                      | 1            | 0                               | 0                   |
| 50 | Indels          | MET     |                  |                           | 7.11641494:GACATGTCCTCCCA:G                | GACATGTCCTCCCA               | G          |                     | Twist cDNA Pan Cancer                           | 0.005              | 10 | 0  | 0  | 80499 | 10               | 100                    | 0.46% (0.25-0.77%)                           | 9 (6-18)                                     | 1            | 0                               | 0                   |
| 51 | Indels          | MET     |                  |                           | 7.116418865:A:ATT                          | A                            | ATT        |                     | Twist cDNA Pan Cancer                           | 0.005              | 8  | 0  | 2  | 80499 | 10               | 80                     | 0.32% (0.11-0.68%)                           | 5 (2-10)                                     | 1            | 0                               | 0                   |
| 52 | Indels          | MET     |                  |                           | 7.116422110:CA:C                           | CA                           | C          |                     | Twist cDNA Pan Cancer                           | 0.005              | 8  | 0  | 2  | 80499 | 10               | 80                     | 0.60% (0.30-0.80%)                           | 10 (5-15)                                    | 1            | 0                               | 0                   |
| 53 | Indels          | MET     |                  |                           | 7.116439056:CATGTGCAAGCGCT                 | CATGTGCAAGCGCT               | C          |                     | Twist cDNA Pan Cancer                           | 0.005              | 10 | 0  | 0  | 80499 | 10               | 100                    | 0.61% (0.17-0.72%)                           | 16 (4-18)                                    | 1            | 0                               | 0                   |
| 54 | Indels          | PDGFR A | S566_E571delinsR |                           | 4.5514051:GCCCATGATGAGCATGA                | GCCCATGATGAGCATGA            | G          |                     | Twist cDNA Pan Cancer                           | 0.005              | 8  | 0  | 2  | 80499 | 10               | 80                     | 0.54% (0.37-0.79%)                           | 10 (7-13)                                    | 1            | 0                               | 0                   |
| 55 | Indels          | PIK3CA  |                  |                           | 3.118927462:GTG:T                          | GT                           | T          |                     | Twist cDNA Pan Cancer                           | 0.005              | 10 | 0  | 0  | 80499 | 10               | 100                    | 0.46% (0.16-0.91%)                           | 6 (2-12)                                     | 1            | 0                               | 0                   |
| 56 | Indels          | PIK3CA  |                  |                           | 3.118928078:AGAAGATTGCT                    |                              |            |                     |                                                 |                    |    |    |    |       |                  |                        |                                              |                                              |              |                                 |                     |



|                                                                | <b>NextSeq 2000</b> |
|----------------------------------------------------------------|---------------------|
| <b>Flow Cell</b>                                               | P2                  |
| <b>N runs</b>                                                  | 2                   |
| <b>N samples</b>                                               | 30                  |
| <b>Reads [M]</b>                                               | 64.10±8.24          |
| <b>Bases [Gb]</b>                                              | 9.68±1.24           |
| <b>Aligned duplex consensus reads [M]</b>                      | 1.28±0.17           |
| <b>Duplex consensus reads aligned on target [%]</b>            | 95.12±1.58          |
| <b>Mean coverage (duplex consensus reads) - from Prime [x]</b> | 910.40±139.91       |
| <b>Fraction of target covered (duplex consensus reads) [%]</b> | 100.00±0.00         |
| <b>Coverage evenness [%]</b>                                   | 86.27±2.98          |



| <b>Alteration type</b> | <b>Variant subset</b>                  | <b>Inter-assay concordance</b> | <b>Intra-assay concordance (mean±sd)</b> |
|------------------------|----------------------------------------|--------------------------------|------------------------------------------|
| <b>SNVs</b>            | <b>ESCAT Level I NSCLC</b>             | 100.00%                        | 100.00±0.00%                             |
|                        | <b>ESCAT Level I (all tumor types)</b> | 100.00%                        | 97.16±4.50%                              |
|                        | <b>All variants</b>                    | 96.81%                         | 90.12±10.27%                             |
| <b>Indels</b>          | <b>ESCAT Level I NSCLC</b>             | 92.59%                         | 89.42±15.77%                             |
|                        | <b>ESCAT Level I (all tumor types)</b> | 94.29%                         | 92.31±12.43%                             |
|                        | <b>All variants</b>                    | 94.93%                         | 90.74±11.75%                             |

|                                                                | <b>NextSeq 500/550</b> | <b>NextSeq 2000</b> | <b>NovaSeq 6000</b> | <b>All</b>    |
|----------------------------------------------------------------|------------------------|---------------------|---------------------|---------------|
| <b>Flow Cell</b>                                               | Mid-output             | P2                  | SP                  |               |
| <b>N runs</b>                                                  | 1                      | 1                   | 1                   | 3             |
| <b>N samples</b>                                               | 15                     | 15                  | 15                  | 45            |
| <b>Reads [M]</b>                                               | 46.25±7.11             | 63.10±8.37          | 68.86±8.45          | 59.17±12.44   |
| <b>Bases [Gb]</b>                                              | 6.89±1.06              | 9.53±1.26           | 10.95±1.34          | 9.07±2.07     |
| <b>Aligned duplex consensus reads [M]</b>                      | 1.06±0.13              | 1.28±0.17           | 1.30±0.18           | 1.21±0.19     |
| <b>Duplex consensus reads aligned on target [%]</b>            | 95.16±1.49             | 95.21±1.53          | 95.31±1.49          | 95.22±1.50    |
| <b>Mean coverage (duplex consensus reads) - from Prime [x]</b> | 752.04±108.16          | 905.13±139.88       | 930.52±144.89       | 861.14±153.42 |
| <b>Fraction of target covered (duplex consensus reads) [%]</b> | 100.00±0.00            | 100.00±0.00         | 100.00±0.00         | 100.00±0.00   |
| <b>Coverage evenness [%]</b>                                   | 82.79±2.69             | 86.14±2.91          | 86.16±3.00          | 85.02±3.28    |

| Alteration type | Variant subset                  | Instrument   | Number positives / Number expected | Analytical sensitivity | Analytical specificity | Observed VAF (median and range)* | Supporting reads depth (median and range)* |
|-----------------|---------------------------------|--------------|------------------------------------|------------------------|------------------------|----------------------------------|--------------------------------------------|
| SNVs + Indels   | ESCAT Level I NSCLC             | NextSeq 550  | 110/116                            | 94.83%                 | 99.89%                 | 0.40 (0.12-1.20%)                | 6 (2-22)                                   |
|                 |                                 | NextSeq 2000 | 115/116                            | 99.14%                 | 99.86%                 | 0.37 (0.13-1.19%)                | 8 (2-23)                                   |
|                 |                                 | NovaSeq 6000 | 111/116                            | 95.69%                 | 99.83%                 | 0.37 (0.12-1.49%)                | 8 (2-25)                                   |
|                 | ESCAT Level I (all tumor types) | NextSeq 550  | 160/170                            | 94.12%                 | 99.89%                 | 0.40 (0.11-1.20%)                | 6 (2-22)                                   |
|                 |                                 | NextSeq 2000 | 166/170                            | 97.65%                 | 99.86%                 | 0.37 (0.13-1.19%)                | 8 (2-23)                                   |
|                 |                                 | NovaSeq 6000 | 163/170                            | 95.88%                 | 99.83%                 | 0.37 (0.12-1.49%)                | 8 (2-25)                                   |
|                 | All variants                    | NextSeq 550  | 720/862                            | 83.53%                 | 99.89%                 | 0.39 (0.11-1.75%)                | 6 (2-22)                                   |
|                 |                                 | NextSeq 2000 | 785/862                            | 91.07%                 | 99.86%                 | 0.37 (0.11-1.43%)                | 7 (2-23)                                   |
|                 |                                 | NovaSeq 6000 | 774/862                            | 89.79%                 | 99.83%                 | 0.36 (0.11-1.49%)                | 7 (2-28)                                   |
| Fusions         | All variants                    | NextSeq 550  | 38/38                              | 100.00%                | 100.00%                | 0.11% (0.05-0.29%)               | 36 (12-73)                                 |
|                 |                                 | NextSeq 2000 | 38/38                              | 100.00%                | 100.00%                | 0.11% (0.05-0.29%)               | 36 (12-73)                                 |
|                 |                                 | NovaSeq 6000 | 38/38                              | 100.00%                | 100.00%                | 0.11% (0.05-0.29%)               | 36 (12-73)                                 |

| <b>Alteration type</b> | <b>Variant subset</b>                  | <b>Number concordant / Total called variants</b> | <b>Pairwise concordance range</b> | <b>Overall concordance</b> |
|------------------------|----------------------------------------|--------------------------------------------------|-----------------------------------|----------------------------|
| <b>SNVs + Indels</b>   | <b>ESCAT Level I NSCLC</b>             | 107/116                                          | 93.86-96.52%                      | 92.24%                     |
|                        | <b>ESCAT Level I (all tumor types)</b> | 156/168                                          | 94.05-97.01%                      | 92.86%                     |
|                        | <b>All variants</b>                    | 690/809                                          | 87.92-94.15%                      | 85.29%                     |

|                                                                | <b>NextSeq 1000/2000</b> | <b>NovaSeq 6000</b> | <b>All</b>    |
|----------------------------------------------------------------|--------------------------|---------------------|---------------|
| <b>Flow Cell</b>                                               | P1/P2                    | SP                  |               |
| <b>N runs</b>                                                  | 4                        | 2                   | 6             |
| <b>N samples</b>                                               | 16                       | 20                  | 36            |
| <b>Reads [M]</b>                                               | 61.55±10.88              | 57.74±10.70         | 59.59±10.95   |
| <b>Bases [Gb]</b>                                              | 9.29±1.64                | 9.18±1.70           | 9.24±1.67     |
| <b>Aligned duplex consensus reads [M]</b>                      | 1.24±0.22                | 1.26±0.25           | 1.25±0.23     |
| <b>Duplex consensus reads aligned on target [%]</b>            | 94.62±1.81               | 98.40±1.59          | 96.62±2.54    |
| <b>Mean coverage (duplex consensus reads) - from Prime [x]</b> | 888.00±166.88            | 931.50±174.59       | 910.43±172.28 |
| <b>Fraction of target covered (duplex consensus reads) [%]</b> | 100.00±0.00              | 100.00±0.00         | 100.00±0.00   |
| <b>Coverage evenness [%]</b>                                   | 86.34±3.83               | 80.82±3.26          | 83.49±4.50    |

|                 |                                 | Spike-in frequency | Analytical sensitivity |        |         |         |         |         |
|-----------------|---------------------------------|--------------------|------------------------|--------|---------|---------|---------|---------|
|                 |                                 |                    | 0.10%                  | 0.25%  | 0.50%   | 1.00%   | 2.50%   | 5.00%   |
| Alteration type | Variant subset                  | N variants tested  |                        |        |         |         |         |         |
| SNVs            | ESCAT Level I NSCLC             | 63                 | 31.75%                 | 63.49% | 100.00% | 98.41%  | 100.00% | 100.00% |
|                 | ESCAT Level I (all tumor types) | 96                 | 34.38%                 | 61.46% | 96.88%  | 97.92%  | 100.00% | 100.00% |
|                 | All variants                    | 393                | 33.33%                 | 63.10% | 93.64%  | 96.18%  | 100.00% | 100.00% |
| Indels          | ESCAT Level I NSCLC             | 12                 | 25.00%                 | 83.33% | 91.67%  | 100.00% | 100.00% | 100.00% |
|                 | ESCAT Level I (all tumor types) | 18                 | 27.78%                 | 77.78% | 94.44%  | 94.44%  | 100.00% | 100.00% |
|                 | All variants                    | 234                | 23.50%                 | 62.82% | 90.60%  | 93.59%  | 100.00% | 99.57%  |
| Fusions         | All variants                    | 27                 | 88.89%                 | 88.89% | 100.00% | 100.00% | 100.00% | 100.00% |

|                                                                | <b>NextSeq 500/550</b> | <b>NextSeq 2000</b> | <b>NovaSeq 6000</b> | <b>All</b>    |
|----------------------------------------------------------------|------------------------|---------------------|---------------------|---------------|
| <b>Flow Cell</b>                                               | Mid-output             | P2                  | SP                  |               |
| <b>N runs</b>                                                  | 1                      | 1                   | 1                   | 3             |
| <b>N samples</b>                                               | 6                      | 3                   | 6                   | 15            |
| <b>Reads [M]</b>                                               | 50.39±3.02             | 74.76±3.67          | 59.17±9.20          | 58.77±10.97   |
| <b>Bases [Gb]</b>                                              | 7.51±0.45              | 11.29±0.55          | 9.41±1.46           | 9.02±1.74     |
| <b>Aligned duplex consensus reads [M]</b>                      | 1.14±0.28              | 1.53±0.09           | 1.00±0.21           | 1.17±0.30     |
| <b>Duplex consensus reads aligned on target [%]</b>            | 95.84±0.38             | 97.65±0.07          | 96.99±1.04          | 96.65±1.00    |
| <b>Mean coverage (duplex consensus reads) - from Prime [x]</b> | 778.95±210.38          | 1116.63±62.68       | 722.36±166.70       | 826.03±227.95 |
| <b>Fraction of target covered (duplex consensus reads) [%]</b> | 100.00±0.00            | 100.00±0.00         | 100.00±0.00         | 100.00±0.00   |
| <b>Coverage evenness [%]</b>                                   | 85.58±1.27             | 81.34±0.19          | 83.93±2.96          | 84.08±2.56    |

|                 |                                 |                   | Analytical sensitivity |         |         |         |         |
|-----------------|---------------------------------|-------------------|------------------------|---------|---------|---------|---------|
|                 |                                 | Input cfDNA       | 10 ng                  | 20 ng   | 25 ng   | 30 ng   | 50 ng   |
| Alteration type | Variant subset                  | N variants tested |                        |         |         |         |         |
| SNVs            | ESCAT Level I NSCLC             | 51                | 98.04%                 | 94.12%  | 94.12%  | 100.00% | 96.08%  |
|                 | ESCAT Level I (all tumor types) | 78                | 91.03%                 | 94.87%  | 96.15%  | 98.72%  | 94.87%  |
|                 | All variants                    | 372               | 87.37%                 | 92.47%  | 93.55%  | 90.32%  | 94.62%  |
| Indels          | ESCAT Level I NSCLC             | 12                | 91.67%                 | 91.67%  | 100.00% | 100.00% | 100.00% |
|                 | ESCAT Level I (all tumor types) | 18                | 88.89%                 | 94.44%  | 100.00% | 100.00% | 100.00% |
|                 | All variants                    | 231               | 83.98%                 | 93.51%  | 94.81%  | 91.34%  | 92.64%  |
| Fusions         | All variants                    | 27                | 92.59%                 | 100.00% | 100.00% | 100.00% | 100.00% |



| Proficiency test | Sample                                        | Expected result (Gene:Transcript:Exon:cDNA:Protein)   | Expected VAF - Lead institutes | Observed VAF - Hedera HP2 |
|------------------|-----------------------------------------------|-------------------------------------------------------|--------------------------------|---------------------------|
| QuIP ESR1        | 1                                             | ESR1:NM_000125:Exon 8:c.1610A>C:p.(Tyr537Ser)         | 2.60%                          | 1.36%                     |
|                  | 2                                             | ESR1:NM_000125:Exon 8:c.1609T>A:p.(Tyr537Asn)         | 3.20%                          | 2.21%                     |
|                  |                                               | ESR1:NM_000125:Exon 5:c.1138G>C:p.(Glu380Gln)         | 1.20%                          | 2.60%                     |
|                  | 3                                             | ESR1:NM_000125:Exon 8:c.1607T>A:p.(Leu536His)         | 1.60%                          | 2.10%                     |
|                  | 4                                             | ESR1:NM_000125:Exon 8:c.1610A>G:p.(Tyr537Cys)         | 1.50%                          | 2.05%                     |
|                  |                                               | ESR1:NM_000125:Exon 5:c.1138G>C:p.(Glu380Gln)         | 7.10%                          | 7.41%                     |
|                  | 5                                             | Wildtype                                              | Wildtype                       | Wildtype                  |
|                  | 6                                             | ESR1:NM_000125:Exon 8:c.1613A>G:p.(Asp538Gly)         | 1.40%                          | 2.73%                     |
|                  | 7                                             | ESR1:NM_000125:Exon 5:c.1138G>C:p.(Glu380Gln)         | 1.40%                          | 1.48%                     |
|                  | 8                                             | ESR1:NM_000125:Exon 8:c.1609T>A:p.(Tyr537Asn)         | 1.60%                          | 1.30%                     |
| 9                | ESR1:NM_000125:Exon 8:c.1607T>G:p.(Leu536Arg) | 1.30%                                                 | 1.96%                          |                           |
| 10               | ESR1:NM_000125:Exon 8:c.1610A>G:p.(Tyr537Cys) | 1.30%                                                 | 2.28%                          |                           |
| QuIP METex14     | 1                                             | MET:NC_000007.13(NM_001127500.3):c.2942-26_2942-10del | N/A                            | 2.20%                     |
|                  | 2                                             | MET:NC_000007.13(NM_001127500.3):c.3082G>C            | N/A                            | 2.44%                     |
|                  | 3                                             | MET:NC_000007.13(NM_001127500.3):c.2942-18_2942-5del  | N/A                            | 8.16%                     |
|                  | 4                                             | Wildtype                                              | N/A                            | Wildtype                  |
|                  | 5                                             | MET:NC_000007.13(NM_001127500.3):c.3082+1G>T          | N/A                            | 1.49%                     |
|                  | 6                                             | MET:NC_000007.13(NM_001127500.3):c.2942-18_2942-5del  | N/A                            | 1.53%                     |
|                  | 7                                             | Wildtype                                              | N/A                            | Wildtype                  |
|                  | 8                                             | MET:NC_000007.13(NM_001127500.3):c.3082G>C            | N/A                            | 4.50%                     |
|                  | 9                                             | MET:NC_000007.13(NM_001127500.3):c.2942-26_2942-10del | N/A                            | 6.30%                     |
|                  | 10                                            | MET:NC_000007.13(NM_001127500.3):c.3082+1G>T          | N/A                            | 5.23%                     |

|                                                                                                         | NextSeq 500/550 | NextSeq 500/550.1 | NextSeq 1000/2000 | NovaSeq 6000   | All            |
|---------------------------------------------------------------------------------------------------------|-----------------|-------------------|-------------------|----------------|----------------|
| <b>Flow Cell</b>                                                                                        | High-output     | Mid-output        | P2                | SP             |                |
| <b>N runs</b>                                                                                           | 1               | 10                | 2                 | 3              | 16             |
| <b>N samples</b>                                                                                        | 16              | 47                | 9                 | 65             | 137            |
| <b>Reads [M]</b>                                                                                        | 45.12±6.11      | 45.14±12.42       | 60.41±9.84        | 53.22±21.39    | 49.98±17.43    |
| <b>Bases [Gb]</b>                                                                                       | 6.65±0.90       | 6.71±1.85         | 9.12±1.49         | 7.96±3.18      | 7.46±2.61      |
| <b>Aligned duplex consensus reads [M]</b>                                                               | 1.15±0.20       | 1.15±0.32         | 1.36±0.50         | 1.29±0.57      | 1.23±0.46      |
| <b>Duplex consensus reads aligned on target [%]</b>                                                     | 93.03±1.92      | 94.77±1.78        | 92.21±2.29        | 93.48±2.74     | 93.79±2.46     |
| <b>Mean coverage (duplex consensus reads) - from Varis [x]</b>                                          | 814.00±153.01   | 822.34±234.10     | 949.22±372.69     | 911.66±394.54  | 872.08±326.94  |
| <b>Mean coverage on exons relevant for NSCLC ESCAT Level 1 SNVs/Indels (duplex consensus reads) [x]</b> | 977.38±198.11   | 1020.46±296.65    | 1379.47±1004.90   | 1090.93±468.94 | 1072.45±462.37 |
| <b>Fraction of target covered (duplex consensus reads) [%]</b>                                          | 100.00±0.00     | 99.96±0.11        | 99.99±0.02        | 100.00±0.00    | 99.99±0.07     |
| <b>Coverage evenness [%]</b>                                                                            | 81.26±3.09      | 79.37±4.19        | 72.83±9.85        | 82.52±6.09     | 80.65±6.12     |

| ESCAT Level 1 variant                                         | ESCAT cancer type    | Number agreeing / Total | Concordance | Observed VAF (median and range) |
|---------------------------------------------------------------|----------------------|-------------------------|-------------|---------------------------------|
| <b>ALK SNVs (Acquired resistance kinase domain mutations)</b> | NSCLC                | 2/2                     | 100.00%     | 17.98% (0.14-35.81%)            |
| <b>BRAF V600E</b>                                             | NSCLC, CRC, Melanoma | 4/5                     | 80.00%      | 0.80% (0.20-29.63%)             |
| <b>EGFR C797S</b>                                             | NSCLC                | 2/2                     | 100.00%     | 1.34% (0.90-1.77%)              |
| <b>EGFR Ex 19 Deletions</b>                                   | NSCLC                | 28/29                   | 96.55%      | 3.36% (0.11-67.57%)             |
| <b>EGFR Exon 20 insertions</b>                                | NSCLC                | 2/2                     | 100.00%     | 39.79% (3.83-75.75%)            |
| <b>EGFR G719S</b>                                             | NSCLC                | 1/1                     | 100.00%     | 0.87% (0.87-0.87%)              |
| <b>EGFR L858R</b>                                             | NSCLC                | 14/16                   | 87.50%      | 5.36% (0.16-74.26%)             |
| <b>EGFR L861Q</b>                                             | NSCLC                | 2/2                     | 100.00%     | 4.24% (2.83-5.65%)              |
| <b>EGFR S768I in exon 20</b>                                  | NSCLC                | 1/1                     | 100.00%     | 1.22% (1.22-1.22%)              |
| <b>EGFR T790M</b>                                             | NSCLC                | 3/4                     | 75.00%      | 1.32% (1.30-4.07%)              |
| <b>ESR1</b>                                                   | Breast               | 11/14                   | 78.57%      | 0.76% (0.18-58.21%)             |
| <b>ESR1</b>                                                   | Breast               | 2/3                     | 66.67%      | 2.97% (1.02-4.93%)              |
| <b>KRAS G12C/D/V</b>                                          | NSCLC                | 5/5                     | 100.00%     | 0.41% (0.13-4.68%)              |
| <b>KRAS G12C/D/V</b>                                          | NSCLC, CRC           | 10/11                   | 90.91%      | 4.92% (1.43-53.34%)             |
| <b>KRAS G13D</b>                                              | NSCLC, CRC           | 1/1                     | 100.00%     | 4.19% (4.19-4.19%)              |
| <b>KRAS Q61K/H</b>                                            | NSCLC, CRC           | 6/6                     | 100.00%     | 3.00% (0.37-24.49%)             |
| <b>MET Exon 14 Skipping</b>                                   | NSCLC                | 1/1                     | 100.00%     | 11.30% (11.30-11.30%)           |
| <b>PIK3CA E542K</b>                                           | Breast               | 4/4                     | 100.00%     | 1.18% (0.35-14.93%)             |
| <b>PIK3CA E545K</b>                                           | Breast               | 5/7                     | 71.43%      | 1.01% (0.15-14.27%)             |
| <b>PIK3CA H1047R</b>                                          | Breast               | 4/4                     | 100.00%     | 14.98% (0.61-53.11%)            |

| <b>Sample ID</b>                                           | <b>cfDNA Input amount (ng)</b> | <b>Variant</b> | <b>Expected VAF%</b> | <b>Observed VAF%</b> |
|------------------------------------------------------------|--------------------------------|----------------|----------------------|----------------------|
| <b>Sample 42<br/>(from<br/>Supplementary<br/>Table S3)</b> | <b>30 ng</b>                   | EGFR T790M     | 2.10%                | 1.32%                |
|                                                            |                                | EGFR L858R     | 12.70%               | 12.63%               |
|                                                            | <b>20 ng</b>                   | EGFR T790M     | -                    | 1.38%                |
|                                                            |                                | EGFR L858R     | -                    | 10.40%               |
|                                                            | <b>10 ng</b>                   | EGFR T790M     | -                    | 1.88%                |
|                                                            |                                | EGFR L858R     | -                    | 10.68%               |

| Sample ID | Variant           | Input ng<br>Other Vendor | Observed VAF%<br>Other Vendor                      | Input ng<br>HP2 | Observed<br>VAF%<br>HP2 |
|-----------|-------------------|--------------------------|----------------------------------------------------|-----------------|-------------------------|
| Sample 8  | BRAF K601E        | 37.7 ng                  | 0.60%                                              | 13.3 ng         | 0.86%                   |
| Sample 22 | BRAF K601E        | 33.7 ng                  | 0.11%                                              | 21.7 ng         | 0.34%                   |
| Sample 10 | EGFR E746_A750del | 73.7 ng                  | 0.44%                                              | 40.0 ng         | 0.75%                   |
| Sample 13 | PIK3CA E545K      | 58.6 ng                  | 0.20%                                              | 40.0 ng         | 1.01%                   |
| Sample 14 | EGFR S768I        | 52.8 ng                  | 0.60%                                              | 40.0 ng         | 1.22%                   |
|           | PIK3CA H1047R     |                          | 1.70%                                              |                 | 3.69%                   |
| Sample 39 | EGFR E746_A750del | 100.0 ng                 | 3.40%                                              | 30.0 ng         | 2.85%                   |
|           | KRAS K117N        |                          | not detected                                       |                 | 0.15%                   |
| Sample 9  | KRAS G12F         | 73.7 ng                  | 1.13%                                              | 40.0 ng         | 1.43%                   |
| Sample 17 | KIT Y578H         | 100.0 ng                 | 1.20%                                              | 40.0 ng         | 3.77%                   |
|           | BRAF K499E        |                          | 1.70%                                              |                 | 3.78%                   |
|           | KRAS G13D         |                          | 1.00%                                              |                 | 4.19%                   |
|           | KRAS A146T        |                          | not detected                                       |                 | 0.48%                   |
| Sample 12 | NRAS I55V         | 100.0 ng                 | 3.60%                                              | 40.0 ng         | 2.11%                   |
| Sample 16 | PIK3CA E542K      | 36.8 ng                  | 0.62%                                              | 35.0 ng         | 1.20%                   |
| Sample 19 | EGFR E746_A750del | 100.0 ng                 | 8.20%                                              | 40.0 ng         | 8.18%                   |
|           | EML4-ALK fusion   |                          | not detected in LbX kit<br>but confirmed in tissue |                 | 0.17%                   |

| <b>Sample type</b> | <b>Cancer type</b> | <b>Orthogonal MSI status</b> | <b>Predicted MSI status</b> | <b>Count</b> | <b>Unique</b> |
|--------------------|--------------------|------------------------------|-----------------------------|--------------|---------------|
| FFPE               | CRC                | MSI-high                     | MSI-high                    | 7            | 5             |
| FFPE               | CRC                | MSS                          | MSI-high                    | 1            | 1             |
| FFPE               | CRC                | MSS                          | MSS                         | 2            | 2             |
| FFPE               | Endometrial        | MSI-high                     | MSI-high                    | 2            | 2             |
| FFPE               | Endometrial        | MSS                          | MSS                         | 3            | 3             |
| FFPE               | NSCLC              | MSS                          | MSS                         | 5            | 5             |
| FFPE               | other              | MSS                          | MSS                         | 7            | 7             |
| cfDNA              | CRC                | MSI-high                     | MSI-high                    | 4            | 3             |
| cfDNA              | CRC                | MSS                          | MSS                         | 2            | 2             |
| cfDNA              | Endometrial        | MSI-high                     | MSI-high                    | 1            | 1             |
| cfDNA              | NSCLC              | MSS                          | MSS                         | 43           | 37            |
| cfDNA              | other              | MSS                          | MSS                         | 1            | 1             |
