# Supplementary material for: Analytical Validation of a Pan-Cancer NGS Assay for In-House Liquid Biopsy Testing: An International Multicenter Study
Source: bioRxiv or medRxiv preprint supplement (doi:10.1101/2024.10.17.24313324), 2024-10-25
Supplement: Supplementary file [file media-3.pdf]

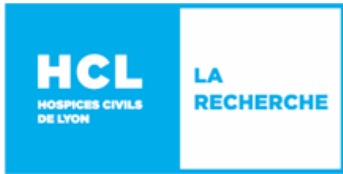

## Comité Scientifique et Éthique des Hospices Civils de LYON

CSE-HCL – IRB 00013204

3, QUAI DES CELESTINS  
69002 LYON – FRANCE  
B.P. 2251 –  
69229 LYON CEDEX 02

*Scientific and Ethics Committee of Hospices Civils de Lyon  
- France -*

**Président**

Pr Cyrille CONFAVREUX

**Vice-Présidente**

Pr Claire FALANDRY

**PURPOSE:** Request for ethics opinion from the Scientific and Ethics Committee of Hospices Civils de Lyon

**Secrétariat CSE**

Jonathan LARGUIER

☎ : 04.72.40.70.69

✉ : [hcl.cse@chu-lyon.fr](mailto:hcl.cse@chu-lyon.fr)

**Secteur Recherche sur données**

✉ : [drs.donnees@chu-lyon.fr](mailto:drs.donnees@chu-lyon.fr)

|                                       |                                                                                                                                                                                                                         |
|---------------------------------------|-------------------------------------------------------------------------------------------------------------------------------------------------------------------------------------------------------------------------|
| <b>Study Name</b>                     | <b>Validation of a Pan-Cancer NGS Liquid Biopsy Test for Routine Hospital Use: An International Multicenter Clinical Performance Evaluation</b>                                                                         |
| <b>Investigator – Contact Details</b> | Pr. Léa PAYEN-GAY<br>Hospices Civils de Lyon<br>Laboratoire de Biologie Médicale Multi-Sites (LBMMS) Centre hospitalier Lyon Sud Centre de Biologie Sud - Bât 3D<br>165 Chemin du Grand Revoyet<br>69 495 PIERRE BENITE |
| <b>Email</b>                          | lea.payen-gay@chu-lyon.fr                                                                                                                                                                                               |
| <b>Request date (DD/MM/YYYY)</b>      | 27/09/2024                                                                                                                                                                                                              |

Dear Sir/Madam

I am requesting the opinion of the Scientific and Ethics Committee of the Hospices Civils de Lyon on the above-mentioned database study, for publication.

Please do not hesitate to contact me if you require any further information.

---

### Opinion from the Scientific and Ethics Committee

On behalf of the Scientific and Ethics Committee, after careful examination, I formally confirm that none ethical approval was required for the paper entitled "Validation of a Pan-Cancer NGS Liquid Biopsy Test for Routine Hospital Use: An International Multicenter Clinical Performance Evaluation".

*We thank you for submitting this request to the Scientific and Ethics Committee.*

*Yours sincerely*

Pr Cyrille CONFAVREUX,  
Président du Comité Scientifique et Ethique des  
Hospices Civils de Lyon  
*Head of the Scientific and Ethics Committee*
